# Supplementary material
Source: Research Square preprint supplement (doi:10.21203/rs.3.rs-9112549/v1)
Supplement: Supplementary file 1 [file 4dd831b053b0b0f1a8f62168.docx]

T1 Questionnaire Materials【Employee】

**Dear Sir/Madam,**

Hello!

Our team is currently conducting research under the National Natural Science Foundation of China (NSFC) Youth Fund Project. This is an independent survey study aimed at achieving a win-win outcome for both enterprises and employees while innovating enterprise human resource management practices. All information collected will be used solely for this research project. The questionnaire data will be kept strictly confidential and will not be disclosed to any third party. Please answer with confidence.

In the following questionnaire, you will encounter several types of questions. There are **no “right” or “wrong” answers** to any of the items. Please read the instructions carefully first, then respond according to your own genuine feelings and thoughts. Make sure you do not miss any questions. Under normal circumstances, the questionnaire can be completed in about **20 minutes**.

We sincerely appreciate your support and cooperation!Thank you again for your participation. We wish you good health and success in your work!

**1. The following statements describe your direct supervisor. Please indicate the degree to which you agree with each statement by placing a “√” or circling the appropriate number.**

| **Description** | **Strongly Disagree** | **Disagree** | **Somewhat Agree** | **Agree** | **Strongly Agree** |
| --- | --- | --- | --- | --- | --- |
| 1. My supervisor praises his/her superior to make the superior feel that he/she is very likable. | 1 | 2 | 3 | 4 | 5 |
| 2. My supervisor proactively shows concern for the superior’s daily affairs to demonstrate friendliness. | 1 | 2 | 3 | 4 | 5 |
| 3. My supervisor frequently compliments the superior on his/her work achievements to convey goodwill. | 1 | 2 | 3 | 4 | 5 |
| 4. My supervisor provides special attention to the superior beyond normal work duties in order to maintain a good relationship. | 1 | 2 | 3 | 4 | 5 |

**Please fill in or check the box that best describes your personal background information.**

1.Your gender: □ Male  □ Female

2.Your age:

□ 25 years old or younger  □ 26–30 years old  □ 31–35 years old  □ 36 years old or older

3.Your highest level of education:

□ High school/technical secondary school or below  □ Vocational high school/junior college  □ Bachelor’s degree or above

1. How long have you been working in your current position?

□ Less than 1 year  □ 1–3 years  □ 3–5 years  □ 5 years or more

1. How long have you been working with your current direct supervisor?

□ Less than 1 year  □ 1–3 years  □ 3–5 years  □ 5 years or more

6.Your name initials (e.g., Zhang San → ZS): ________

7.Your direct supervisor’s name initials (e.g., Li Si → LS): ________

T1 Questionnaire Materials【Leader】

**Dear Sir/Madam,**

Hello!

Our team is currently conducting research under the National Natural Science Foundation of China (NSFC) Youth Fund Project. This is an independent survey study aimed at achieving a win-win outcome for both enterprises and employees while innovating enterprise human resource management practices. All information collected will be used solely for this research project. The questionnaire data will be kept strictly confidential and will not be disclosed to any third party. Please answer with confidence.

In the following questionnaire, you will encounter several types of questions. There are **no “right” or “wrong” answers** to any of the items. Please read the instructions carefully first, then respond according to your own genuine feelings and thoughts. Make sure you do not miss any questions. Under normal circumstances, the questionnaire can be completed in about **20 minutes**.

We sincerely appreciate your support and cooperation!Thank you again for your participation. We wish you good health and success in your work!

**1. The following statements describe your perceptions of your superior. Please indicate the degree to which you agree with each statement by placing a “√” or circling the appropriate number.**

| **Description** | **Strongly Disagree** | **Disagree** | **Somewhat Agree** | **Agree** | **Strongly Agree** |
| --- | --- | --- | --- | --- | --- |
| 1. My superior has frequent interactions with certain individual subordinates. | 1 | 2 | 3 | 4 | 5 |
| 2. My superior shares his/her thoughts and practices with a fixed few colleagues in the team. | 1 | 2 | 3 | 4 | 5 |
| 3. In the team, I believe that certain subordinates have significant influence on my superior’s decisions. | 1 | 2 | 3 | 4 | 5 |
| 4. In the team, my superior has close personal relationships with certain individual subordinates. | 1 | 2 | 3 | 4 | 5 |
| 5. My superior conveys information through specific subordinates. | 1 | 2 | 3 | 4 | 5 |
| 6. In the team, my superior has subordinates whom he/she particularly trusts. | 1 | 2 | 3 | 4 | 5 |
| 7. In the entire team, I feel that my superior treats subordinates quite differently. | 1 | 2 | 3 | 4 | 5 |
| 8. Some subordinates are promoted much faster than others. | 1 | 2 | 3 | 4 | 5 |
| 9. My superior often assigns personal matters to certain individual subordinates to handle. | 1 | 2 | 3 | 4 | 5 |
| 10. Certain subordinates assist my superior in handling routine tasks. | 1 | 2 | 3 | 4 | 5 |
| 11. Certain subordinates can perform most of my superior’s duties on his/her behalf. | 1 | 2 | 3 | 4 | 5 |

**Please fill in or check the box that best describes your personal background information.**

1.Your gender: □ Male  □ Female

2.Your age:

□ 25 years old or younger  □ 26–30 years old  □ 31–35 years old  □ 36 years old or older

3.Your highest level of education:

□ High school/technical secondary school or below  □ Vocational high school/junior college  □ Bachelor’s degree or above

1. How long have you been working in your current position?

□ Less than 1 year  □ 1–3 years  □ 3–5 years  □ 5 years or more

7.Your name initials (e.g., Zhang San → ZS): ________

8.Your direct subordinate’s name initials (e.g., Li Si → LS): ________

T2 Questionnaire Materials【Employee】

**Dear Sir/Madam,**

Hello!

Our team is currently conducting research under the National Natural Science Foundation of China (NSFC) Youth Fund Project. This is an independent survey study aimed at achieving a win-win outcome for both enterprises and employees while innovating enterprise human resource management practices. All information collected will be used solely for this research project. The questionnaire data will be kept strictly confidential and will not be disclosed to any third party. Please answer with confidence.

In the following questionnaire, you will encounter several types of questions. There are **no “right” or “wrong” answers** to any of the items. Please read the instructions carefully first, then respond according to your own genuine feelings and thoughts. Make sure you do not miss any questions. Under normal circumstances, the questionnaire can be completed in about **20 minutes**.

We sincerely appreciate your support and cooperation!Thank you again for your participation. We wish you good health and success in your work!

**1. The following statements describe some aspects of your direct supervisor. Please indicate the degree to which you agree with each statement by placing a “√” or circling the appropriate number.**

| **Description** | **Strongly Disagree** | **Disagree** | **Somewhat Agree** | **Agree** | **Strongly Agree** |
| --- | --- | --- | --- | --- | --- |
| 1. My supervisor belittles my personality or displays a condescending attitude toward me. | 1 | 2 | 3 | 4 | 5 |
| 2. My supervisor ignores my work reports or shows little interest in my suggestions. | 1 | 2 | 3 | 4 | 5 |
| 3. My supervisor makes demeaning or insulting comments about my personality. | 1 | 2 | 3 | 4 | 5 |
| 4. My supervisor uses unprofessional ways to address me in public or private settings. | 1 | 2 | 3 | 4 | 5 |
| 5. My supervisor deliberately ignores or excludes me from the team during work. | 1 | 2 | 3 | 4 | 5 |
| 6. My supervisor questions my professional judgment and decisions within my area of responsibility. | 1 | 2 | 3 | 4 | 5 |
| 7. My supervisor inappropriately tries to discuss personal topics with me. | 1 | 2 | 3 | 4 | 5 |

**Please fill in or check the box that best describes your personal background information.**

1.Your name initials (e.g., Zhang San → ZS): ________

2.Your direct supervisor’s name initials (e.g., Li Si → LS): ________

T2 Questionnaire Materials【Leader】

**Dear Sir/Madam,**

Hello!

Our team is currently conducting research under the National Natural Science Foundation of China (NSFC) Youth Fund Project. This is an independent survey study aimed at achieving a win-win outcome for both enterprises and employees while innovating enterprise human resource management practices. All information collected will be used solely for this research project. The questionnaire data will be kept strictly confidential and will not be disclosed to any third party. Please answer with confidence.

In the following questionnaire, you will encounter several types of questions. There are **no “right” or “wrong” answers** to any of the items. Please read the instructions carefully first, then respond according to your own genuine feelings and thoughts. Make sure you do not miss any questions. Under normal circumstances, the questionnaire can be completed in about **20 minutes**.

We sincerely appreciate your support and cooperation!Thank you again for your participation. We wish you good health and success in your work!

**1. The following statements describe some aspects of how you feel. Please indicate the degree to which you agree with each statement by placing a “√” or circling the appropriate number.**

| **Description** | **Strongly Disagree** | **Disagree** | **Somewhat Agree** | **Agree** | **Strongly Agree** |
| --- | --- | --- | --- | --- | --- |
| 1. I feel that my work emotionally drains me. | 1 | 2 | 3 | 4 | 5 |
| 2. I feel that my work is too tiring. | 1 | 2 | 3 | 4 | 5 |
| 3. Just thinking about facing another day of work makes me feel exhausted. | 1 | 2 | 3 | 4 | 5 |

**Please fill in or check the box that best describes your personal background information.**

1.Your name initials (e.g., Zhang San → ZS): ________

2.Your direct subordinate’s name initials (you may list multiple subordinates, separated by commas): ________

T3 Questionnaire Materials【Employee】

**Dear Sir/Madam,**

Hello!

Our team is currently conducting research under the National Natural Science Foundation of China (NSFC) Youth Fund Project. This is an independent survey study aimed at achieving a win-win outcome for both enterprises and employees while innovating enterprise human resource management practices. All information collected will be used solely for this research project. The questionnaire data will be kept strictly confidential and will not be disclosed to any third party. Please answer with confidence.

In the following questionnaire, you will encounter several types of questions. There are **no “right” or “wrong” answers** to any of the items. Please read the instructions carefully first, then respond according to your own genuine feelings and thoughts. Make sure you do not miss any questions. Under normal circumstances, the questionnaire can be completed in about **20 minutes**.

We sincerely appreciate your support and cooperation!Thank you again for your participation. We wish you good health and success in your work!

**1. The following statements describe some of your behaviors. Please indicate the degree to which you agree with each statement by placing a “√” or circling the appropriate number.**

| **Description** | **Strongly Disagree** | **Disagree** | **Somewhat Agree** | **Agree** | **Strongly Agree** |
| --- | --- | --- | --- | --- | --- |
| 1. After work or during holidays, I call or visit my supervisor. | 1 | 2 | 3 | 4 | 5 |
| 2. On traditional festivals or special occasions, my supervisor invites me to his/her home for meals or gatherings. | 1 | 2 | 3 | 4 | 5 |
| 3. On important days such as my supervisor’s birthday, I proactively visit and express my regards. | 1 | 2 | 3 | 4 | 5 |
| 4. I proactively discuss work ideas, difficulties I encounter, and my personal needs with my supervisor. | 1 | 2 | 3 | 4 | 5 |
| 5. I understand and care about my supervisor’s work progress and family situation. | 1 | 2 | 3 | 4 | 5 |
| 6. When disagreements arise, I support and defend my supervisor’s decisions and positions. | 1 | 2 | 3 | 4 | 5 |

**Please fill in or check the box that best describes your personal background information.**

1.Your name initials (e.g., Zhang San → ZS): ________

2.Your direct supervisor’s name initials (e.g., Li Si → LS): ________
