# Supplementary material
Source: Research Square preprint supplement (doi:10.21203/rs.3.rs-9112549/v1)
Supplement: Supplementary file 2 [file 9e879e06df1b988cb0901147.docx]

**(High Leader Upward Ingratiation × High Perceived Climate of Team Cha-Xu )**

Hello!

This is an independent survey study conducted under the National Natural Science Foundation of China (NSFC) Youth Fund Project, aimed at achieving a win-win outcome for both enterprises and employees while innovating enterprise human resource management practices. All information collected will be used solely for this research project. The experimental data will be kept strictly confidential and will not be disclosed to any third party. Please answer with confidence.

The entire experiment may take approximately **10 minutes** to complete. Please read the experimental materials carefully and answer the subsequent questions. During the experiment, please imagine yourself in the described enterprise situation and vividly envision your feelings and behaviors in that context.

Thank you again for your cooperation. We wish you good health and success in your work!

**Warm Reminder:** Please read the following text material carefully first, then imagine yourself as the “you” (protagonist) in the material, and answer the subsequent items according to your genuine current thoughts and feelings.

You are Liu Wei, the department manager of the Product R&D Department at a technology company. You work alongside department managers such as Li from the Marketing Department, and your direct superior is Vice President Wang. To gain more promotion opportunities, you not only work hard but also pay attention to maintaining your relationship with Vice President Wang.

At last week’s regular meeting, Vice President Wang proposed the plan of “fully shifting to the AIGC technology route,” and you took the lead in praising Vice President Wang for his visionary strategic foresight. On ordinary days, upon learning that Vice President Wang was feeling unwell, you immediately delivered medicine in person and inquired warmly about his health. One day, upon learning that Vice President Wang had a family gathering that evening, you proactively offered to drive and provide transportation for the leader.

Every Monday morning, Vice President Wang meets privately with Marketing Department Manager Li in his office for coffee to discuss strategy. Other department managers (including you) only receive an email in the afternoon to be updated on the strategy decisions. At the annual budget meeting, Vice President Wang originally planned to reduce R&D investment, but after Manager Li requested more funds for advertising in the Marketing Department, Vice President Wang immediately revised the budget table on the spot, cutting R&D expenses by 15% and reallocating them to the Marketing Department. During the company’s integrity investigation, Vice President Wang only allowed Manager Li to participate in the internal audit team. When you discovered abnormal data in the Marketing Department and reported it, Vice President Wang refused your report on the grounds that Manager Li had already reviewed it and found no issues.

**Section I.** According to the material you just read, and imagining yourself as the protagonist in the material, please answer the following questions.

1. Your superior is Vice President Zhang. □ Yes  □ No
2. Your company is a technology company. □ Yes  □ No

**Section II.** According to the material you just read, and imagining yourself as the protagonist in the material, please answer the following questions.

1. In this situation, you praise Vice President Wang to make him feel that you are very likable. □ Strongly Disagree  □ Disagree  □ Uncertain  □ Agree  □ Strongly Agree
2. In this situation, you proactively show concern for Vice President Wang’s daily affairs to demonstrate friendliness. □ Strongly Disagree  □ Disagree  □ Uncertain  □ Agree  □ Strongly Agree
3. In this situation, you provide special attention to Vice President Wang beyond normal work duties in order to maintain a good relationship. □ Strongly Disagree  □ Disagree  □ Uncertain  □ Agree  □ Strongly Agree
4. In your view, Vice President Wang has frequent interactions with Marketing Department Manager Li. □ Strongly Disagree  □ Disagree  □ Uncertain  □ Agree  □ Strongly Agree
5. In this situation, you believe that Marketing Department Manager Li has significant influence on Vice President Wang’s decisions. □ Strongly Disagree  □ Disagree  □ Uncertain  □ Agree  □ Strongly Agree
6. In your view, Vice President Wang particularly trusts Marketing Department Manager Li. □ Strongly Disagree  □ Disagree  □ Uncertain  □ Agree  □ Strongly Agree

**Section III.** According to the material you just read, and imagining yourself as the protagonist in the material, please answer the following questions.

1. In this situation, you feel that your work emotionally drains you. □ Completely Inconsistent  □ Inconsistent  □ Uncertain  □ Consistent  □ Completely Consistent
2. In this situation, you feel that your work is too tiring. □ Completely Inconsistent  □ Inconsistent  □ Uncertain  □ Consistent  □ Completely Consistent
3. In this situation, just thinking about facing another day of work makes you feel exhausted. □ Completely Inconsistent  □ Inconsistent  □ Uncertain  □ Consistent  □ Completely Consistent
4. In this situation, you belittle a certain subordinate’s personality or display a condescending attitude toward a certain subordinate. □ Completely Inconsistent  □ Inconsistent  □ Uncertain  □ Consistent  □ Completely Consistent
5. In this situation, you ignore a certain subordinate’s work reports or show little interest in a subordinate’s suggestions. □ Completely Inconsistent  □ Inconsistent  □ Uncertain  □ Consistent  □ Completely Consistent
6. In this situation, you make demeaning or insulting comments about a certain subordinate’s personality. □ Completely Inconsistent  □ Inconsistent  □ Uncertain  □ Consistent  □ Completely Consistent
7. In this situation, you use unprofessional ways to address a certain subordinate in public or private settings. □ Completely Inconsistent  □ Inconsistent  □ Uncertain  □ Consistent  □ Completely Consistent
8. In this situation, you deliberately ignore or exclude a certain subordinate from the team during work. □ Completely Inconsistent  □ Inconsistent  □ Uncertain  □ Consistent  □ Completely Consistent
9. In this situation, you question a certain subordinate’s professional judgment and decisions within his/her area of responsibility. □ Completely Inconsistent  □ Inconsistent  □ Uncertain  □ Consistent  □ Completely Consistent
10. In this situation, you inappropriately try to discuss personal topics with a certain subordinate. □ Completely Inconsistent  □ Inconsistent  □ Uncertain  □ Consistent  □ Completely Consistent

**Section IV.** Please read the material thoroughly, imagine yourself as the protagonist in the story, and answer the following questions.

In the last week of September, the office should have been filled with a relaxed and expectant atmosphere before the National Day holiday. However, for several consecutive weeks, you have been silently enduring pressure: the market promotion plan for a new company product has encountered obstacles, and as the person in charge, the burden on your shoulders feels as heavy as a thousand pounds. Lack of sleep and inner anxiety have left you shrouded in an invisible gloom, and your former vitality has disappeared. At this critical moment, a core strategic element of the project triggered a fierce conflict with Marketing Department Manager Li. The voices of the argument penetrated the glass door of the office, and your clear and forceful rebuttal, along with Manager Li’s equally raised tone, could be heard clearly by the subordinates in the outer office area.

1. In this situation, you believe that subordinates would call you or visit your home after work or during holidays. □ Completely Inconsistent  □ Inconsistent  □ Uncertain  □ Consistent  □ Completely Consistent
2. In this situation, you believe that subordinates would support and defend your decisions and positions when disagreements arise. □ Completely Inconsistent  □ Inconsistent  □ Uncertain  □ Consistent  □ Completely Consistent
3. In this situation, you believe that subordinates would understand and care about your work progress and family situation. □ Completely Inconsistent  □ Inconsistent  □ Uncertain  □ Consistent  □ Completely Consistent
4. In this situation, you believe that subordinates would proactively discuss work ideas, difficulties they encounter, and their personal needs with you. □ Completely Inconsistent  □ Inconsistent  □ Uncertain  □ Consistent  □ Completely Consistent
5. On traditional festivals or special occasions, you invite your subordinates to your home for meals or gatherings. □ Completely Inconsistent  □ Inconsistent  □ Uncertain  □ Consistent  □ Completely Consistent
6. In this situation, you believe that subordinates would proactively visit you and express their regards on important days such as your birthday. □ Completely Inconsistent  □ Inconsistent  □ Uncertain  □ Consistent  □ Completely Consistent

**Section V.** Please answer the following questions according to your own actual situation.

1. Your gender □ Male  □ Female
2. Your age □ 25 years old or younger  □ 26–30 years old  □ 31–35 years old  □ 36 years old or older
3. Your education level □ High school/technical secondary school or below  □ High school/technical secondary school or below  □ Vocational high school/junior college  □ Bachelor’s degree or above
4. Your years of work experience □ Less than 1 year  □ 1–3 years  □ 3–5 years  □ 5 years or more

**(High Leader Upward Ingratiation × Low Perceived Climate of Team Cha-Xu)**

Hello!

This is an independent survey study conducted under the National Natural Science Foundation of China (NSFC) Youth Fund Project, aimed at achieving a win-win outcome for both enterprises and employees while innovating enterprise human resource management practices. All information collected will be used solely for this research project. The experimental data will be kept strictly confidential and will not be disclosed to any third party. Please answer with confidence.

The entire experiment may take approximately **10 minutes** to complete. Please read the experimental materials carefully and answer the subsequent questions. During the experiment, please imagine yourself in the described enterprise situation and vividly envision your feelings and behaviors in that context.

Thank you again for your cooperation. We wish you good health and success in your work!

**Warm Reminder:** Please read the following text material carefully first, then imagine yourself as the “you” (protagonist) in the material, and answer the subsequent items according to your genuine current thoughts and feelings.

You are Liu Wei, the department manager of the Product R&D Department at a technology company. You work alongside department managers such as Li from the Marketing Department, and your direct superior is Vice President Wang. To gain more promotion opportunities, you not only work hard but also pay attention to maintaining your relationship with Vice President Wang.

At last week’s regular meeting, Vice President Wang proposed the plan of “fully shifting to the AIGC technology route,” and you took the lead in praising Vice President Wang for his visionary strategic foresight. On ordinary days, upon learning that Vice President Wang was feeling unwell, you immediately delivered medicine in person and inquired warmly about his health. One day, upon learning that Vice President Wang had a family gathering that evening, you proactively offered to drive and provide transportation for the leader.

Every Monday morning, Vice President Wang holds one-on-one meetings with each department manager on a rotating basis, with the schedule posted on the OA system. At the annual budget meeting, Vice President Wang required all departments to submit data-supported application reports, and the final allocation was decided by an independent finance committee vote. Your R&D investment application was fully approved due to the detailed experimental data. During the company’s integrity investigation, Vice President Wang formed a cross-departmental audit team and selected members by random draw, emphasizing that no one may interfere with audit independence; you were randomly selected to participate in the investigation.

**Section I.** According to the material you just read, and imagining yourself as the protagonist in the material, please answer the following questions.

1. Your superior is Vice President Zhang. □ Yes  □ No
2. Your company is a technology company. □ Yes  □ No

**Section II.** According to the material you just read, and imagining yourself as the protagonist in the material, please answer the following questions.

1. In this situation, you praise Vice President Wang to make him feel that you are very likable. □ Strongly Disagree  □ Disagree  □ Uncertain  □ Agree  □ Strongly Agree
2. In this situation, you proactively show concern for Vice President Wang’s daily affairs to demonstrate friendliness. □ Strongly Disagree  □ Disagree  □ Uncertain  □ Agree  □ Strongly Agree
3. In this situation, you provide special attention to Vice President Wang beyond normal work duties in order to maintain a good relationship. □ Strongly Disagree  □ Disagree  □ Uncertain  □ Agree  □ Strongly Agree
4. In your view, Vice President Wang has frequent interactions with Marketing Department Manager Li. □ Strongly Disagree  □ Disagree  □ Uncertain  □ Agree  □ Strongly Agree
5. In this situation, you believe that Marketing Department Manager Li has significant influence on Vice President Wang’s decisions. □ Strongly Disagree  □ Disagree  □ Uncertain  □ Agree  □ Strongly Agree
6. In your view, Vice President Wang particularly trusts Marketing Department Manager Li. □ Strongly Disagree  □ Disagree  □ Uncertain  □ Agree  □ Strongly Agree

**Section III.** (Identical to the first condition)

**Section IV.** (Identical scenario paragraph as the first condition)

**Section V.** (Identical demographics as the first condition)

**(Low Leader Upward Ingratiation × High Perceived Climate of Team Cha-Xu)**

Hello!

This is an independent survey study conducted under the National Natural Science Foundation of China (NSFC) Youth Fund Project, aimed at achieving a win-win outcome for both enterprises and employees while innovating enterprise human resource management practices. All information collected will be used solely for this research project. The experimental data will be kept strictly confidential and will not be disclosed to any third party. Please answer with confidence.

The entire experiment may take approximately **10 minutes** to complete. Please read the experimental materials carefully and answer the subsequent questions. During the experiment, please imagine yourself in the described enterprise situation and vividly envision your feelings and behaviors in that context.

Thank you again for your cooperation. We wish you good health and success in your work!

**Warm Reminder:** Please read the following text material carefully first, then imagine yourself as the “you” (protagonist) in the material, and answer the subsequent items according to your genuine current thoughts and feelings.

You are Liu Wei, Head of the Product R&D Department at a technology company. You work alongside managers from various departments, including Manager Li from the Marketing Department, and your direct superior is the company’s Deputy General Manager, Vice President Wang. You are diligent in your work and maintain a professional relationship with Vice President Wang.

At last week’s regular meeting, Vice President Wang proposed a plan to ‘make a complete shift to the AIGC technology route’. You immediately presented data to refute this and suggested a phased implementation, without the slightest regard for Vice President Wang’s feelings. On a day-to-day basis, even when you knew Vice President Wang was unwell, you still sent him your work for review as usual. One day, upon learning that Vice President Wang was attending a family gathering, you merely offered your best wishes and continued with your daily work duties alongside your staff, without offering any special consideration to your superior.

Every Monday morning, Deputy General Manager Wang meets privately with Mr Li, the Marketing Manager, in his office over coffee to discuss strategy. Other department managers, including yourself, only receive an email on Monday afternoon to be briefed on the strategic decisions made. At the annual budget meeting, Vice President Wang had originally planned to cut R&D expenditure. However, after Manager Li requested additional funds for the Marketing Department’s advertising campaign, Vice President Wang amended the budget on the spot, reducing R&D expenditure by 15% and allocating the funds to the Marketing Department. During the company’s integrity investigation, Vice President Wang only included Manager Li in the internal audit team. When you identified anomalies in the Marketing Department’s data and reported them, Vice President Wang rejected your report on the grounds that Manager Li had already reviewed the data and found no issues.

**Section I.** According to the material you just read, and imagining yourself as the protagonist in the material, please answer the following questions.

1. Your superior is Vice President Zhang. □ Yes  □ No
2. Your company is a technology company. □ Yes  □ No

**Section II.** According to the material you just read, and imagining yourself as the protagonist in the material, please answer the following questions.

1. In this situation, you praise Vice President Wang to make him feel that you are very likable. □ Strongly Disagree  □ Disagree  □ Uncertain  □ Agree  □ Strongly Agree
2. In this situation, you proactively show concern for Vice President Wang’s daily affairs to demonstrate friendliness. □ Strongly Disagree  □ Disagree  □ Uncertain  □ Agree  □ Strongly Agree
3. In this situation, you provide special attention to Vice President Wang beyond normal work duties in order to maintain a good relationship. □ Strongly Disagree  □ Disagree  □ Uncertain  □ Agree  □ Strongly Agree
4. In your view, Vice President Wang has frequent interactions with Marketing Department Manager Li. □ Strongly Disagree  □ Disagree  □ Uncertain  □ Agree  □ Strongly Agree
5. In this situation, you believe that Marketing Department Manager Li has significant influence on Vice President Wang’s decisions. □ Strongly Disagree  □ Disagree  □ Uncertain  □ Agree  □ Strongly Agree
6. In your view, Vice President Wang particularly trusts Marketing Department Manager Li. □ Strongly Disagree  □ Disagree  □ Uncertain  □ Agree  □ Strongly Agree

**Section III.** (Identical to the first condition)

**Section IV.** (Identical scenario paragraph as the first condition)

**Section V.** (Identical demographics as the first condition)

**(Low Leader Upward Ingratiation × Low Perceived Climate of Team Cha-Xu)**

Hello!

This is an independent survey study conducted under the National Natural Science Foundation of China (NSFC) Youth Fund Project, aimed at achieving a win-win outcome for both enterprises and employees while innovating enterprise human resource management practices. All information collected will be used solely for this research project. The experimental data will be kept strictly confidential and will not be disclosed to any third party. Please answer with confidence.

The entire experiment may take approximately **10 minutes** to complete. Please read the experimental materials carefully and answer the subsequent questions. During the experiment, please imagine yourself in the described enterprise situation and vividly envision your feelings and behaviors in that context.

Thank you again for your cooperation. We wish you good health and success in your work!

**Warm Reminder:** Please read the following text material carefully first, then imagine yourself as the “you” (protagonist) in the material, and answer the subsequent items according to your genuine current thoughts and feelings.

You are Liu Wei, Head of the Product R&D Department at a technology company. You work alongside managers from various departments, including Manager Li from the Marketing Department, and your immediate superior is the company’s Deputy General Manager, Vice President Wang. You are diligent in your work and maintain a professional relationship with Vice President Wang.

At last week’s regular meeting, Vice President Wang proposed a plan to ‘make a complete shift to the AIGC technology route’. You immediately presented data to refute this and suggested a phased implementation, showing no regard for Vice President Wang’s feelings. On a day-to-day basis, even when you were aware that Vice President Wang was unwell, you continued to send him your work for review as usual. One day, upon learning that Vice President Wang had a family gathering, you merely offered your best wishes and continued with your daily work alongside your staff, without offering any special consideration to your superior.

Every Monday morning, Vice President Wang holds one-on-one meetings with department managers in rotation; the schedule is published on the OA system. At the annual budget meeting, Vice President Wang required each department to submit data-backed proposals, with the final allocation decided by a vote of the independent finance committee. Your R&D funding application was approved in full due to the thorough experimental data provided. During the company’s integrity investigation, Vice President Wang formed a cross-departmental audit team, selecting members by drawing lots and emphasising that no one was to interfere with the audit’s independence; you were randomly selected to participate in the investigation.

**Section I.** According to the material you just read, and imagining yourself as the protagonist in the material, please answer the following questions.

1. Your superior is Vice President Zhang. □ Yes  □ No
2. Your company is a technology company. □ Yes  □ No

**Section II.** According to the material you just read, and imagining yourself as the protagonist in the material, please answer the following questions.

1. In this situation, you praise Vice President Wang to make him feel that you are very likable. □ Strongly Disagree  □ Disagree  □ Uncertain  □ Agree  □ Strongly Agree
2. In this situation, you proactively show concern for Vice President Wang’s daily affairs to demonstrate friendliness. □ Strongly Disagree  □ Disagree  □ Uncertain  □ Agree  □ Strongly Agree
3. In this situation, you provide special attention to Vice President Wang beyond normal work duties in order to maintain a good relationship. □ Strongly Disagree  □ Disagree  □ Uncertain  □ Agree  □ Strongly Agree
4. In your view, Vice President Wang has frequent interactions with Marketing Department Manager Li. □ Strongly Disagree  □ Disagree  □ Uncertain  □ Agree  □ Strongly Agree
5. In this situation, you believe that Marketing Department Manager Li has significant influence on Vice President Wang’s decisions. □ Strongly Disagree  □ Disagree  □ Uncertain  □ Agree  □ Strongly Agree
6. In your view, Vice President Wang particularly trusts Marketing Department Manager Li. □ Strongly Disagree  □ Disagree  □ Uncertain  □ Agree  □ Strongly Agree

**Section III.** (Identical to the first condition)

**Section IV.** (Identical scenario paragraph as the first condition)

**Section V.** (Identical demographics as the first condition)
