# Supplementary material
Source: Research Square preprint supplement (doi:10.21203/rs.3.rs-9112549/v1)
Supplement: Supplementary file 2 [file 5313486250a55c30195f3684.xlsx]

## Sheet: 数据整理
ID	PersonID	FID	EE1	EE2	EE3	CX1	CX2	CX3	CX4	CX5	CX6	CX7	CX8	CX9	CX10	CX11	Gender	Age	Edu	Year	UI1	UI2	UI3	UI4	WI1	WI2	WI3	WI4	WI5	WI6	WI7	SSG1	SSG2	SSG3	SSG4	SSG5	SSG6	gender	age	edu	year	time
1	1	1	3	3	3	3	3	3	4	4	2	2	3	4	2	4	1	4	3	4	3	5	5	3	1	1	1	2	1	1	1	5	5	5	5	5	5	2	2	3	3	3
2	2	1	3	3	3	3	3	3	4	4	2	2	3	4	2	4	1	4	3	4	4	5	3	4	3	2	3	3	3	2	3	4	4	4	5	3	5	1	4	2	4	3
3	3	1	3	3	3	3	3	3	4	4	2	2	3	4	2	4	1	4	3	4	4	4	4	5	4	4	3	4	5	5	3	3	3	3	3	3	4	1	1	3	1	1
4	4	1	3	3	3	3	3	3	4	4	2	2	3	4	2	4	1	4	3	4	3	4	3	3	1	3	3	3	1	1	1	4	3	3	4	4	4	2	2	3	3	3
5	5	1	3	3	3	3	3	3	4	4	2	2	3	4	2	4	1	4	3	4	2	2	2	2	2	3	4	2	4	2	2	2	3	3	3	2	3	2	2	3	3	2
6	1	2	1	3	1	2	2	1	1	1	3	3	1	3	2	2	1	2	3	2	3	3	2	4	3	2	3	3	2	2	1	4	3	5	4	3	5	1	2	3	3	2
7	2	2	1	3	1	2	2	1	1	1	3	3	1	3	2	2	1	2	3	2	2	2	3	2	3	2	2	2	2	2	3	4	4	3	4	4	4	2	1	3	1	1
8	3	2	1	3	1	2	2	1	1	1	3	3	1	3	2	2	1	2	3	2	4	4	4	3	4	4	4	4	2	2	2	4	4	4	4	4	4	2	2	3	2	2
9	4	2	1	3	1	2	2	1	1	1	3	3	1	3	2	2	1	2	3	2	4	4	3	3	1	2	1	1	2	1	2	3	4	4	4	4	4	2	3	3	3	3
10	5	2	1	3	1	2	2	1	1	1	3	3	1	3	2	2	1	2	3	2	3	3	2	4	2	2	2	4	4	4	2	4	4	3	4	3	4	2	2	3	2	2
11	6	2	1	3	1	2	2	1	1	1	3	3	1	3	2	2	1	2	3	2	2	2	2	2	4	4	4	4	2	2	4	4	4	4	3	4	3	1	1	3	1	1
12	7	2	1	3	1	2	2	1	1	1	3	3	1	3	2	2	1	2	3	2	3	2	2	4	4	2	4	3	4	3	2	5	4	4	4	4	5	2	1	3	1	1
13	8	2	1	3	1	2	2	1	1	1	3	3	1	3	2	2	1	2	3	2	4	3	4	5	2	3	2	2	2	4	4	3	4	5	3	5	4	1	2	3	2	2
14	1	3	4	5	5	3	3	3	3	3	3	3	5	5	3	3	1	2	3	2	4	5	5	5	4	5	3	5	5	3	3	2	3	3	1	2	1	2	2	3	2	2
15	2	3	4	5	5	3	3	3	3	3	3	3	5	5	3	3	1	2	3	2	3	5	5	4	4	5	3	5	3	5	5	2	1	2	1	2	1	2	2	3	2	2
16	3	3	4	5	5	3	3	3	3	3	3	3	5	5	3	3	1	2	3	2	5	5	4	5	4	3	5	5	3	3	4	3	3	3	1	2	3	1	3	3	3	3
17	4	3	4	5	5	3	3	3	3	3	3	3	5	5	3	3	1	2	3	2	3	3	3	4	3	3	5	3	3	3	3	4	4	4	3	3	2	1	2	3	3	2
18	5	3	4	5	5	3	3	3	3	3	3	3	5	5	3	3	1	2	3	2	4	4	4	4	3	4	3	4	5	3	3	3	3	1	2	2	1	2	2	3	2	2
19	1	4	5	5	4	5	4	3	5	3	3	5	4	5	3	5	2	3	3	3	5	5	5	5	3	3	4	5	3	5	4	2	2	2	3	4	3	1	1	3	2	2
20	2	4	5	5	4	5	4	3	5	3	3	5	4	5	3	5	2	3	3	3	4	4	4	4	3	3	4	3	3	4	5	5	3	3	5	5	5	2	2	3	3	2
21	3	4	5	5	4	5	4	3	5	3	3	5	4	5	3	5	2	3	3	3	4	4	4	3	3	4	4	4	4	3	5	3	3	3	2	2	3	1	2	3	2	2
22	4	4	5	5	4	5	4	3	5	3	3	5	4	5	3	5	2	3	3	3	4	4	4	4	4	5	5	4	5	3	4	2	2	2	2	4	2	1	2	3	3	3
23	5	4	5	5	4	5	4	3	5	3	3	5	4	5	3	5	2	3	3	3	4	4	4	4	3	5	4	4	3	4	3	3	2	4	2	4	3	1	2	3	3	2
24	6	4	5	5	4	5	4	3	5	3	3	5	4	5	3	5	2	3	3	3	5	4	3	5	5	3	5	4	5	5	5	3	4	2	4	3	2	2	1	3	1	1
25	7	4	5	5	4	5	4	3	5	3	3	5	4	5	3	5	2	3	3	3	3	4	3	4	5	5	5	5	3	4	4	2	3	2	4	4	3	2	1	3	1	1
26	1	5	4	4	4	4	3	5	3	4	3	5	3	5	4	5	1	4	2	4	3	5	4	5	4	5	5	4	3	4	3	3	3	3	1	3	2	1	3	2	4	3
27	2	5	4	4	4	4	3	5	3	4	3	5	3	5	4	5	1	4	2	4	3	3	4	5	5	4	4	4	4	5	3	2	2	2	3	3	1	2	3	2	3	3
28	3	5	4	4	4	4	3	5	3	4	3	5	3	5	4	5	1	4	2	4	3	2	4	4	4	5	5	3	3	5	4	3	3	2	2	1	3	2	3	3	3	3
29	4	5	4	4	4	4	3	5	3	4	3	5	3	5	4	5	1	4	2	4	4	2	4	4	3	5	4	3	4	4	3	2	4	2	4	4	2	1	1	3	2	2
30	5	5	4	4	4	4	3	5	3	4	3	5	3	5	4	5	1	4	2	4	3	3	4	5	4	5	3	3	3	3	4	2	3	2	4	4	4	2	2	3	3	2
31	6	5	4	4	4	4	3	5	3	4	3	5	3	5	4	5	1	4	2	4	4	4	4	4	4	3	5	4	5	3	4	2	2	2	1	1	2	1	2	3	2	2
32	7	5	4	4	4	4	3	5	3	4	3	5	3	5	4	5	1	4	2	4	4	2	4	4	5	4	5	3	5	3	4	1	1	1	1	1	1	1	2	3	2	2
33	1	6	4	5	4	4	4	5	4	4	4	3	4	5	4	4	1	4	2	4	4	4	3	4	2	4	4	4	4	3	4	2	3	3	3	2	2	2	2	3	2	2
34	2	6	4	5	4	4	4	5	4	4	4	3	4	5	4	4	1	4	2	4	4	4	4	4	4	3	4	4	4	5	5	2	2	3	1	1	1	1	1	3	1	1
35	3	6	4	5	4	4	4	5	4	4	4	3	4	5	4	4	1	4	2	4	5	4	4	4	3	4	2	2	4	4	2	4	4	2	3	4	3	1	3	3	3	3
36	4	6	4	5	4	4	4	5	4	4	4	3	4	5	4	4	1	4	2	4	3	3	5	5	3	3	3	2	2	3	1	3	3	4	3	4	4	1	2	3	2	2
37	1	7	1	1	3	5	5	5	5	5	3	5	3	3	5	3	1	3	3	4	4	3	3	2	3	3	1	3	3	3	2	3	4	4	3	4	4	1	2	3	2	2
38	2	7	1	1	3	5	5	5	5	5	3	5	3	3	5	3	1	3	3	4	2	3	3	2	2	2	2	2	2	2	2	4	4	4	4	4	4	1	2	3	2	2
39	3	7	1	1	3	5	5	5	5	5	3	5	3	3	5	3	1	3	3	4	3	2	3	2	2	4	2	2	2	4	4	5	3	4	4	4	5	1	2	3	3	2
40	4	7	1	1	3	5	5	5	5	5	3	5	3	3	5	3	1	3	3	4	2	3	2	2	4	4	4	4	4	5	4	3	4	3	3	4	3	2	2	3	2	2
41	5	7	1	1	3	5	5	5	5	5	3	5	3	3	5	3	1	3	3	4	4	3	2	4	2	4	4	4	4	4	4	4	4	4	4	3	3	2	2	3	2	2
42	1	8	3	4	4	2	4	2	2	4	4	2	2	2	2	3	2	3	3	3	3	4	3	4	5	4	4	3	5	5	3	4	2	2	3	2	2	1	2	3	2	2
43	2	8	3	4	4	2	4	2	2	4	4	2	2	2	2	3	2	3	3	3	4	4	2	4	4	5	4	5	4	3	3	4	3	2	4	4	2	2	2	3	2	2
44	3	8	3	4	4	2	4	2	2	4	4	2	2	2	2	3	2	3	3	3	2	4	4	2	5	5	5	3	3	3	3	2	2	4	2	4	2	1	1	3	2	2
45	1	9	3	3	3	3	2	4	2	4	3	3	3	4	3	4	2	4	2	4	2	2	2	2	3	2	2	3	4	3	2	5	5	4	5	4	4	2	1	3	1	1
46	2	9	3	3	3	3	2	4	2	4	3	3	3	4	3	4	2	4	2	4	4	3	4	2	2	2	4	4	2	3	3	4	2	2	4	2	3	2	2	3	3	2
47	3	9	3	3	3	3	2	4	2	4	3	3	3	4	3	4	2	4	2	4	2	3	2	1	5	4	5	4	3	4	4	4	2	2	2	3	4	1	2	3	3	3
48	4	9	3	3	3	3	2	4	2	4	3	3	3	4	3	4	2	4	2	4	2	1	3	2	2	3	2	4	3	2	4	2	2	3	2	4	2	2	2	3	3	3
49	5	9	3	3	3	3	2	4	2	4	3	3	3	4	3	4	2	4	2	4	2	4	4	4	3	2	2	3	3	2	1	4	5	4	5	4	5	1	4	2	4	3
50	6	9	3	3	3	3	2	4	2	4	3	3	3	4	3	4	2	4	2	4	3	5	5	4	2	3	2	2	4	4	4	3	4	3	4	4	3	2	3	3	4	3
51	1	10	4	4	2	4	3	4	3	2	2	4	3	2	4	4	1	4	2	4	2	4	4	4	2	2	3	3	3	2	3	2	3	2	3	4	4	2	4	2	4	4
52	2	10	4	4	2	4	3	4	3	2	2	4	3	2	4	4	1	4	2	4	2	1	1	3	3	4	4	2	3	4	4	1	3	3	1	1	1	2	1	3	1	1
53	3	10	4	4	2	4	3	4	3	2	2	4	3	2	4	4	1	4	2	4	1	2	3	2	3	2	2	2	4	3	2	2	4	2	2	2	2	1	2	3	2	2
54	1	11	1	3	1	3	3	3	3	3	3	3	3	4	3	3	2	3	3	4	3	3	3	3	1	1	1	1	1	1	1	5	4	5	4	5	5	1	2	3	2	2
55	2	11	1	3	1	3	3	3	3	3	3	3	3	4	3	3	2	3	3	4	2	4	2	3	3	3	1	2	2	1	2	4	3	4	4	4	4	2	1	3	1	1
56	3	11	1	3	1	3	3	3	3	3	3	3	3	4	3	3	2	3	3	4	4	2	4	3	4	2	4	4	4	2	2	4	4	3	4	4	4	2	4	2	4	4
57	4	11	1	3	1	3	3	3	3	3	3	3	3	4	3	3	2	3	3	4	2	3	2	2	5	3	5	4	4	5	4	4	4	4	4	4	4	1	1	3	1	1
58	5	11	1	3	1	3	3	3	3	3	3	3	3	4	3	3	2	3	3	4	2	2	2	4	4	4	4	4	4	5	5	4	4	3	3	4	4	2	2	3	2	2
59	1	12	3	4	5	4	3	4	4	4	4	3	3	4	4	2	1	4	3	4	2	2	2	2	4	4	2	3	4	2	4	4	3	2	4	3	4	2	2	3	2	2
60	2	12	3	4	5	4	3	4	4	4	4	3	3	4	4	2	1	4	3	4	5	5	4	4	1	2	1	1	1	1	1	4	5	5	4	4	5	1	3	2	3	3
61	3	12	3	4	5	4	3	4	4	4	4	3	3	4	4	2	1	4	3	4	4	4	3	4	4	3	5	4	3	4	5	3	2	3	2	1	3	1	2	3	2	2
62	4	12	3	4	5	4	3	4	4	4	4	3	3	4	4	2	1	4	3	4	5	5	5	3	3	1	3	1	1	1	1	3	2	3	2	2	4	1	2	3	2	2
63	5	12	3	4	5	4	3	4	4	4	4	3	3	4	4	2	1	4	3	4	2	4	2	2	2	2	2	2	3	2	2	4	2	2	2	3	3	2	1	3	1	1
64	6	12	3	4	5	4	3	4	4	4	4	3	3	4	4	2	1	4	3	4	3	4	3	4	3	4	4	3	2	4	2	4	4	5	5	5	5	2	2	3	3	3
65	7	12	3	4	5	4	3	4	4	4	4	3	3	4	4	2	1	4	3	4	2	3	2	1	3	2	3	3	4	3	4	4	4	2	4	2	2	2	1	3	1	1
66	8	12	3	4	5	4	3	4	4	4	4	3	3	4	4	2	1	4	3	4	3	2	2	2	2	2	3	2	4	2	4	2	4	2	2	2	2	1	1	3	1	1
67	1	13	4	4	5	3	5	3	5	4	4	4	5	5	4	5	1	4	2	4	3	5	5	5	3	3	3	4	4	3	3	2	2	2	4	3	3	2	2	3	2	2
68	2	13	4	4	5	3	5	3	5	4	4	4	5	5	4	5	1	4	2	4	4	4	2	4	4	4	4	4	4	3	4	4	2	4	4	4	2	2	3	2	4	4
69	3	13	4	4	5	3	5	3	5	4	4	4	5	5	4	5	1	4	2	4	3	4	4	3	3	4	3	4	3	4	4	3	2	4	4	2	4	2	2	3	3	3
70	4	13	4	4	5	3	5	3	5	4	4	4	5	5	4	5	1	4	2	4	4	4	5	3	3	3	3	4	4	4	4	2	4	3	3	3	4	1	1	3	1	1
71	5	13	4	4	5	3	5	3	5	4	4	4	5	5	4	5	1	4	2	4	4	2	2	3	3	3	4	4	3	4	4	5	5	3	5	5	3	1	3	2	3	3
72	6	13	4	4	5	3	5	3	5	4	4	4	5	5	4	5	1	4	2	4	2	4	3	3	3	4	4	5	5	3	4	1	3	1	2	2	2	1	2	3	3	2
73	7	13	4	4	5	3	5	3	5	4	4	4	5	5	4	5	1	4	2	4	1	2	2	3	4	4	4	3	4	3	3	2	4	2	3	2	3	2	2	3	2	2
74	8	13	4	4	5	3	5	3	5	4	4	4	5	5	4	5	1	4	2	4	3	2	4	2	3	3	5	4	4	4	3	1	2	2	2	1	2	2	2	3	3	2
75	1	14	3	3	4	4	2	2	3	2	2	2	2	3	3	2	1	4	2	4	1	3	2	2	4	4	4	4	4	4	4	3	3	4	4	4	2	1	2	3	2	2
76	2	14	3	3	4	4	2	2	3	2	2	2	2	3	3	2	1	4	2	4	3	4	4	4	3	3	4	4	3	4	4	1	2	2	1	2	1	1	1	3	2	2
77	3	14	3	3	4	4	2	2	3	2	2	2	2	3	3	2	1	4	2	4	5	4	5	3	4	3	4	4	4	3	3	4	3	3	3	4	3	2	2	3	3	2
78	4	14	3	3	4	4	2	2	3	2	2	2	2	3	3	2	1	4	2	4	5	4	3	5	4	3	3	4	4	4	4	2	4	4	4	4	4	1	4	3	4	4
79	5	14	3	3	4	4	2	2	3	2	2	2	2	3	3	2	1	4	2	4	4	4	4	3	5	3	4	4	3	4	3	4	2	4	3	4	4	2	2	3	2	2
80	1	15	4	4	4	2	2	3	4	2	2	2	2	4	2	4	2	4	3	4	4	2	4	3	4	3	4	4	4	4	3	3	3	4	2	2	4	2	4	2	4	4
81	2	15	4	4	4	2	2	3	4	2	2	2	2	4	2	4	2	4	3	4	4	3	4	3	4	4	3	4	3	4	4	4	2	2	2	4	4	2	3	3	3	3
82	3	15	4	4	4	2	2	3	4	2	2	2	2	4	2	4	2	4	3	4	3	5	4	5	4	4	3	3	5	4	5	2	2	2	2	2	3	2	2	3	2	2
83	4	15	4	4	4	2	2	3	4	2	2	2	2	4	2	4	2	4	3	4	4	3	4	4	4	4	4	3	4	4	4	4	4	4	2	4	4	1	2	3	2	2
84	5	15	4	4	4	2	2	3	4	2	2	2	2	4	2	4	2	4	3	4	4	5	5	4	5	5	5	5	3	5	5	4	2	3	3	4	2	2	3	3	4	4
85	6	15	4	4	4	2	2	3	4	2	2	2	2	4	2	4	2	4	3	4	4	5	5	5	3	3	4	3	4	4	4	4	3	4	4	4	5	2	4	2	4	3
86	7	15	4	4	4	2	2	3	4	2	2	2	2	4	2	4	2	4	3	4	4	4	2	2	4	4	4	5	5	4	5	1	2	1	2	2	2	1	2	3	2	2
87	8	15	4	4	4	2	2	3	4	2	2	2	2	4	2	4	2	4	3	4	2	2	3	3	4	4	4	4	4	4	4	3	3	2	2	3	3	1	2	3	2	2
88	1	16	4	4	4	2	2	3	4	1	2	2	2	2	2	1	1	4	2	4	3	3	2	4	4	3	3	5	4	4	4	3	4	2	4	2	2	2	1	3	2	2
89	2	16	4	4	4	2	2	3	4	1	2	2	2	2	2	1	1	4	2	4	5	3	5	3	3	4	4	4	3	5	5	2	3	2	2	2	3	1	4	2	4	4
90	3	16	4	4	4	2	2	3	4	1	2	2	2	2	2	1	1	4	2	4	4	4	3	4	3	5	3	4	4	3	4	5	4	3	5	3	5	2	1	3	1	1
91	4	16	4	4	4	2	2	3	4	1	2	2	2	2	2	1	1	4	2	4	2	4	3	2	5	4	3	4	4	5	3	4	2	3	2	4	2	1	4	3	4	4
92	5	16	4	4	4	2	2	3	4	1	2	2	2	2	2	1	1	4	2	4	4	3	4	5	5	3	3	4	3	3	4	3	5	3	5	5	3	1	1	3	2	2
93	1	17	4	4	4	4	5	3	4	4	5	5	3	5	5	5	1	4	3	4	3	4	4	3	5	5	5	5	5	5	5	1	1	1	3	2	1	2	3	2	3	3
94	2	17	4	4	4	4	5	3	4	4	5	5	3	5	5	5	1	4	3	4	5	5	5	5	3	3	4	3	4	4	5	2	1	1	2	2	2	2	3	3	4	4
95	3	17	4	4	4	4	5	3	4	4	5	5	3	5	5	5	1	4	3	4	5	5	3	3	5	5	4	5	5	5	5	1	2	1	2	2	2	1	2	3	2	2
96	4	17	4	4	4	4	5	3	4	4	5	5	3	5	5	5	1	4	3	4	2	2	2	1	4	3	4	4	4	3	4	4	4	4	2	4	3	2	2	3	3	3
97	5	17	4	4	4	4	5	3	4	4	5	5	3	5	5	5	1	4	3	4	3	2	4	3	4	4	4	4	4	4	4	3	4	4	4	5	4	2	3	2	4	4
98	6	17	4	4	4	4	5	3	4	4	5	5	3	5	5	5	1	4	3	4	5	3	4	3	4	4	3	4	4	4	4	2	2	2	2	3	2	1	4	2	4	3
99	7	17	4	4	4	4	5	3	4	4	5	5	3	5	5	5	1	4	3	4	4	2	3	4	4	3	4	3	4	4	3	2	3	3	2	2	4	2	1	3	1	1
100	8	17	4	4	4	4	5	3	4	4	5	5	3	5	5	5	1	4	3	4	5	4	4	4	3	4	3	4	4	3	4	3	4	4	2	2	3	2	1	3	1	1
101	9	17	4	4	4	4	5	3	4	4	5	5	3	5	5	5	1	4	3	4	2	3	2	4	4	3	4	4	4	4	4	3	3	3	3	3	1	1	1	3	1	1
102	1	18	4	2	3	4	2	3	2	2	2	4	2	2	2	4	1	3	3	3	4	4	2	2	4	4	4	4	2	4	3	4	4	2	2	3	4	2	2	3	3	2
103	2	18	4	2	3	4	2	3	2	2	2	4	2	2	2	4	1	3	3	3	4	5	3	3	3	3	3	4	3	3	3	3	3	4	4	4	3	1	1	3	1	1
104	3	18	4	2	3	4	2	3	2	2	2	4	2	2	2	4	1	3	3	3	3	4	4	3	3	4	4	4	5	3	3	3	2	2	2	3	2	1	1	3	1	1
105	4	18	4	2	3	4	2	3	2	2	2	4	2	2	2	4	1	3	3	3	2	3	2	4	1	1	2	3	3	1	1	5	5	5	5	5	5	2	2	3	2	2
106	5	18	4	2	3	4	2	3	2	2	2	4	2	2	2	4	1	3	3	3	5	5	5	4	2	2	4	2	4	4	2	2	3	4	4	2	3	2	2	3	3	3
107	6	18	4	2	3	4	2	3	2	2	2	4	2	2	2	4	1	3	3	3	2	2	3	2	2	4	2	2	3	2	3	4	3	5	5	5	5	1	3	3	3	3
108	7	18	4	2	3	4	2	3	2	2	2	4	2	2	2	4	1	3	3	3	2	2	4	3	4	5	5	4	4	4	4	2	1	2	3	2	2	1	1	3	1	1
109	1	19	3	3	3	2	3	3	3	3	4	2	4	3	3	3	2	4	3	3	5	5	5	5	2	2	3	1	1	1	2	5	5	5	3	4	5	2	3	3	4	4
110	2	19	3	3	3	2	3	3	3	3	4	2	4	3	3	3	2	4	3	3	4	4	4	4	1	2	2	2	1	2	3	4	3	4	3	4	2	1	2	3	2	2
111	3	19	3	3	3	2	3	3	3	3	4	2	4	3	3	3	2	4	3	3	2	3	2	2	1	3	2	2	2	2	2	3	3	4	3	5	3	2	2	3	3	3
112	4	19	3	3	3	2	3	3	3	3	4	2	4	3	3	3	2	4	3	3	5	3	4	4	4	2	4	4	4	4	4	4	2	2	4	3	4	1	1	3	1	1
113	5	19	3	3	3	2	3	3	3	3	4	2	4	3	3	3	2	4	3	3	4	3	3	2	2	3	2	2	3	2	3	2	2	2	2	4	3	2	2	3	3	3
114	6	19	3	3	3	2	3	3	3	3	4	2	4	3	3	3	2	4	3	3	1	2	3	2	4	5	5	4	3	4	4	2	2	2	2	2	2	2	3	2	4	4
115	7	19	3	3	3	2	3	3	3	3	4	2	4	3	3	3	2	4	3	3	5	5	3	4	1	1	1	1	1	1	1	5	5	5	5	5	4	2	2	3	2	2
116	8	19	3	3	3	2	3	3	3	3	4	2	4	3	3	3	2	4	3	3	4	4	4	4	2	2	2	2	3	2	2	3	2	2	2	2	2	2	1	3	1	1
117	1	20	2	2	1	3	3	3	3	4	4	2	3	3	4	4	1	4	3	4	2	2	4	3	4	2	2	2	2	4	3	3	5	4	3	5	3	1	3	3	3	3
118	2	20	2	2	1	3	3	3	3	4	4	2	3	3	4	4	1	4	3	4	2	2	4	2	1	1	2	1	3	3	2	2	4	4	4	3	2	2	1	3	1	1
119	3	20	2	2	1	3	3	3	3	4	4	2	3	3	4	4	1	4	3	4	4	2	4	4	3	2	2	4	4	2	2	4	4	3	4	5	4	1	1	3	1	1
120	1	21	2	3	3	2	3	2	2	2	4	2	2	4	4	2	2	4	3	4	4	4	2	4	4	3	5	4	4	5	4	4	4	4	3	4	4	2	2	3	2	2
121	2	21	2	3	3	2	3	2	2	2	4	2	2	4	4	2	2	4	3	4	2	2	2	3	4	2	2	4	3	4	4	4	4	3	3	3	3	2	3	2	4	3
122	3	21	2	3	3	2	3	2	2	2	4	2	2	4	4	2	2	4	3	4	3	4	2	3	3	1	1	1	1	3	3	4	3	3	4	3	4	2	2	3	3	3
123	1	22	1	3	1	5	5	5	5	5	4	5	5	5	4	5	1	4	3	3	3	3	4	5	2	3	3	3	1	2	1	3	3	4	5	5	5	2	2	3	2	2
124	2	22	1	3	1	5	5	5	5	5	4	5	5	5	4	5	1	4	3	3	3	3	2	3	2	2	3	1	1	1	2	4	4	2	4	3	4	1	1	3	1	1
125	3	22	1	3	1	5	5	5	5	5	4	5	5	5	4	5	1	4	3	3	4	4	3	4	4	4	4	3	4	4	3	5	5	4	3	4	3	2	3	3	4	4
126	4	22	1	3	1	5	5	5	5	5	4	5	5	5	4	5	1	4	3	3	3	4	2	2	5	5	4	4	5	5	4	1	1	2	2	1	2	1	1	3	1	1
127	5	22	1	3	1	5	5	5	5	5	4	5	5	5	4	5	1	4	3	3	1	2	2	2	4	2	2	4	2	4	2	5	5	4	5	5	3	1	4	3	4	4
128	6	22	1	3	1	5	5	5	5	5	4	5	5	5	4	5	1	4	3	3	3	4	2	3	3	3	4	5	5	5	4	2	2	2	2	1	3	1	1	3	1	1
129	7	22	1	3	1	5	5	5	5	5	4	5	5	5	4	5	1	4	3	3	2	2	4	2	3	3	4	5	3	4	4	2	2	2	2	4	2	2	4	2	4	4
130	8	22	1	3	1	5	5	5	5	5	4	5	5	5	4	5	1	4	3	3	2	2	4	2	5	4	4	5	5	4	4	1	2	2	3	2	2	2	1	3	1	1
131	1	23	3	4	3	2	2	4	2	4	2	2	2	3	4	3	1	4	3	4	4	4	5	4	4	2	2	2	4	2	4	3	2	3	2	2	4	1	1	3	2	2
132	2	23	3	4	3	2	2	4	2	4	2	2	2	3	4	3	1	4	3	4	2	4	4	2	5	4	4	3	5	5	4	3	3	2	2	1	2	2	1	3	1	1
133	3	23	3	4	3	2	2	4	2	4	2	2	2	3	4	3	1	4	3	4	4	3	2	4	2	2	2	1	3	2	3	3	4	2	4	4	4	2	1	3	1	1
134	1	24	3	1	2	2	3	2	4	2	3	2	4	2	2	4	1	3	3	3	2	2	2	2	2	2	2	3	2	1	2	5	4	4	4	4	5	2	1	3	1	1
135	2	24	3	1	2	2	3	2	4	2	3	2	4	2	2	4	1	3	3	3	3	2	4	3	1	2	3	2	2	2	2	4	4	4	2	2	4	1	3	2	4	4
136	3	24	3	1	2	2	3	2	4	2	3	2	4	2	2	4	1	3	3	3	2	2	2	3	2	1	3	3	2	1	1	5	5	3	5	5	5	1	1	3	1	1
137	4	24	3	1	2	2	3	2	4	2	3	2	4	2	2	4	1	3	3	3	4	5	5	5	3	3	3	3	3	1	1	3	1	2	2	2	1	1	2	3	2	2
138	5	24	3	1	2	2	3	2	4	2	3	2	4	2	2	4	1	3	3	3	3	2	3	3	3	2	2	2	4	2	2	4	3	4	2	2	2	2	3	2	4	4
139	1	25	2	3	2	2	4	2	2	2	3	2	2	4	2	2	1	2	3	4	2	3	2	2	3	4	4	4	2	2	2	4	4	2	2	4	3	2	3	3	3	3
140	2	25	2	3	2	2	4	2	2	2	3	2	2	4	2	2	1	2	3	4	4	4	4	2	4	4	4	4	4	3	4	5	4	5	4	3	4	1	2	3	2	2
141	3	25	2	3	2	2	4	2	2	2	3	2	2	4	2	2	1	2	3	4	3	3	3	3	2	3	3	3	2	3	3	3	5	3	4	5	5	1	2	3	2	2
142	4	25	2	3	2	2	4	2	2	2	3	2	2	4	2	2	1	2	3	4	4	5	3	4	3	1	3	2	1	2	1	2	4	4	2	3	4	2	2	3	3	2
143	5	25	2	3	2	2	4	2	2	2	3	2	2	4	2	2	1	2	3	4	4	2	2	4	4	4	4	4	4	4	4	4	2	2	4	2	3	1	2	3	3	2
144	1	26	3	4	3	3	3	4	3	3	2	4	3	2	2	2	1	4	3	4	4	5	4	4	3	4	4	4	4	5	5	3	2	2	2	1	3	1	4	3	4	4
145	2	26	3	4	3	3	3	4	3	3	2	4	3	2	2	2	1	4	3	4	3	4	3	4	3	5	5	3	4	5	3	4	4	5	4	4	4	1	2	3	2	2
146	3	26	3	4	3	3	3	4	3	3	2	4	3	2	2	2	1	4	3	4	3	4	4	4	5	5	5	4	4	5	4	1	2	2	2	1	2	1	1	3	1	1
147	4	26	3	4	3	3	3	4	3	3	2	4	3	2	2	2	1	4	3	4	5	3	5	5	5	5	5	5	4	4	4	2	1	1	1	1	1	1	3	3	3	3
148	5	26	3	4	3	3	3	4	3	3	2	4	3	2	2	2	1	4	3	4	4	4	4	5	5	4	5	4	4	3	5	3	2	3	4	2	2	2	2	3	2	2
149	1	27	4	5	4	4	4	2	4	4	4	4	2	4	2	3	2	3	3	4	4	2	2	4	4	4	4	3	4	4	4	4	3	2	2	3	4	1	2	3	3	2
150	2	27	4	5	4	4	4	2	4	4	4	4	2	4	2	3	2	3	3	4	4	2	2	4	3	4	5	4	4	5	4	2	2	2	1	2	2	2	1	3	1	1
151	3	27	4	5	4	4	4	2	4	4	4	4	2	4	2	3	2	3	3	4	3	3	3	2	4	4	3	4	3	5	5	3	2	4	4	4	4	2	2	3	3	3
152	4	27	4	5	4	4	4	2	4	4	4	4	2	4	2	3	2	3	3	4	5	5	4	5	5	4	3	5	3	5	4	1	2	2	3	2	2	2	3	3	3	3
153	5	27	4	5	4	4	4	2	4	4	4	4	2	4	2	3	2	3	3	4	4	4	4	4	3	4	3	5	5	4	4	2	2	2	2	1	2	2	1	3	1	1
154	6	27	4	5	4	4	4	2	4	4	4	4	2	4	2	3	2	3	3	4	4	2	4	4	3	4	4	3	3	4	4	5	3	4	5	3	5	2	1	3	1	1
155	7	27	4	5	4	4	4	2	4	4	4	4	2	4	2	3	2	3	3	4	3	4	3	5	3	3	4	4	3	4	3	5	5	5	5	5	5	2	1	3	1	1
156	8	27	4	5	4	4	4	2	4	4	4	4	2	4	2	3	2	3	3	4	5	4	3	3	3	5	4	5	4	5	5	3	2	2	3	4	4	2	1	3	1	1
157	1	28	5	4	5	3	5	3	3	3	3	5	3	4	5	3	2	3	3	4	5	5	5	4	3	5	5	4	3	3	4	3	3	4	3	2	2	2	1	3	1	1
158	2	28	5	4	5	3	5	3	3	3	3	5	3	4	5	3	2	3	3	4	5	5	4	5	4	4	3	5	3	3	4	4	4	3	3	2	4	1	1	3	1	1
159	3	28	5	4	5	3	5	3	3	3	3	5	3	4	5	3	2	3	3	4	5	5	3	4	5	4	3	5	3	3	4	1	1	1	1	2	1	1	1	3	1	1
160	4	28	5	4	5	3	5	3	3	3	3	5	3	4	5	3	2	3	3	4	5	4	4	5	4	3	3	3	3	4	3	3	2	2	3	2	3	1	3	3	4	4
161	5	28	5	4	5	3	5	3	3	3	3	5	3	4	5	3	2	3	3	4	2	2	4	4	4	3	4	5	5	3	5	1	1	1	1	1	1	2	3	2	4	3
162	6	28	5	4	5	3	5	3	3	3	3	5	3	4	5	3	2	3	3	4	3	5	5	3	3	5	4	5	4	3	3	2	2	1	1	1	1	1	2	3	2	2
163	7	28	5	4	5	3	5	3	3	3	3	5	3	4	5	3	2	3	3	4	2	2	2	2	5	5	3	3	3	4	5	4	4	3	2	4	4	1	1	3	1	1
164	8	28	5	4	5	3	5	3	3	3	3	5	3	4	5	3	2	3	3	4	3	4	5	5	3	4	5	5	3	4	5	1	2	2	2	1	1	1	2	3	3	2
165	1	29	4	5	5	5	5	4	5	5	5	5	5	5	5	5	2	4	3	4	4	4	4	4	4	5	4	3	5	4	4	4	3	2	2	4	2	1	2	3	2	2
166	2	29	4	5	5	5	5	4	5	5	5	5	5	5	5	5	2	4	3	4	4	4	4	3	3	4	5	5	4	3	3	1	2	3	1	1	2	2	3	2	4	3
167	3	29	4	5	5	5	5	4	5	5	5	5	5	5	5	5	2	4	3	4	3	3	5	5	5	4	4	5	5	3	4	1	1	1	2	2	2	1	1	3	1	1
168	4	29	4	5	5	5	5	4	5	5	5	5	5	5	5	5	2	4	3	4	5	5	5	5	3	3	3	4	3	4	3	3	3	1	1	3	3	1	2	3	2	2
169	5	29	4	5	5	5	5	4	5	5	5	5	5	5	5	5	2	4	3	4	5	4	5	4	4	4	3	5	4	5	4	5	4	4	4	3	5	1	1	3	1	1
170	1	30	4	2	2	3	2	4	2	3	2	2	2	3	4	3	1	4	3	4	2	2	2	2	4	4	4	3	4	4	4	3	5	5	4	4	4	2	2	3	2	2
171	2	30	4	2	2	3	2	4	2	3	2	2	2	3	4	3	1	4	3	4	2	3	3	4	5	5	5	5	4	5	4	2	3	2	4	2	2	1	1	3	1	1
172	3	30	4	2	2	3	2	4	2	3	2	2	2	3	4	3	1	4	3	4	2	3	2	3	3	3	4	2	3	4	4	5	4	3	4	5	5	1	2	3	2	2
173	1	31	4	4	4	4	2	2	2	3	2	2	2	2	2	2	1	4	3	4	4	4	3	4	3	2	4	2	4	4	4	5	5	5	5	5	5	1	1	3	1	1
174	2	31	4	4	4	4	2	2	2	3	2	2	2	2	2	2	1	4	3	4	5	3	3	3	3	3	3	2	3	2	3	3	2	2	1	2	2	2	1	3	1	1
175	3	31	4	4	4	4	2	2	2	3	2	2	2	2	2	2	1	4	3	4	4	5	3	5	4	4	4	4	5	5	4	4	3	4	2	2	4	1	2	3	3	3
176	4	31	4	4	4	4	2	2	2	3	2	2	2	2	2	2	1	4	3	4	5	3	4	4	4	2	3	2	4	4	4	2	1	1	2	1	1	2	1	3	1	1
177	5	31	4	4	4	4	2	2	2	3	2	2	2	2	2	2	1	4	3	4	4	5	5	4	3	3	5	4	5	4	4	4	4	4	4	4	5	1	2	3	3	2
178	1	32	3	3	4	3	3	5	5	5	4	5	3	3	4	3	2	3	3	4	4	5	5	5	3	3	3	3	4	3	3	4	4	4	4	3	2	1	4	2	4	4
179	2	32	3	3	4	3	3	5	5	5	4	5	3	3	4	3	2	3	3	4	2	2	2	2	3	4	3	4	4	4	3	4	3	4	2	4	2	1	2	3	3	2
180	3	32	3	3	4	3	3	5	5	5	4	5	3	3	4	3	2	3	3	4	2	2	2	4	4	5	5	4	4	4	5	1	1	1	2	1	2	1	1	3	1	1
181	4	32	3	3	4	3	3	5	5	5	4	5	3	3	4	3	2	3	3	4	4	3	3	3	5	5	5	4	4	5	3	3	3	2	1	1	1	1	1	3	1	1
182	5	32	3	3	4	3	3	5	5	5	4	5	3	3	4	3	2	3	3	4	4	4	4	4	4	5	3	5	4	4	4	3	2	3	2	3	4	1	2	3	2	2
183	1	33	4	5	4	3	3	4	4	4	2	4	2	4	4	4	2	3	3	4	1	3	2	2	4	4	4	4	4	4	4	4	3	4	2	3	4	2	2	3	3	3
184	2	33	4	5	4	3	3	4	4	4	2	4	2	4	4	4	2	3	3	4	2	2	2	3	3	4	4	4	3	4	3	4	4	3	4	4	4	2	1	3	1	1
185	3	33	4	5	4	3	3	4	4	4	2	4	2	4	4	4	2	3	3	4	4	2	4	4	4	4	4	4	4	4	4	2	4	3	2	4	2	1	3	2	4	3
186	4	33	4	5	4	3	3	4	4	4	2	4	2	4	4	4	2	3	3	4	3	4	3	3	5	3	3	4	4	4	3	2	1	3	2	2	2	1	2	3	2	2
187	5	33	4	5	4	3	3	4	4	4	2	4	2	4	4	4	2	3	3	4	3	4	4	5	4	4	4	3	4	3	4	5	4	5	4	5	4	1	4	2	4	4
188	6	33	4	5	4	3	3	4	4	4	2	4	2	4	4	4	2	3	3	4	4	5	5	4	4	5	5	4	5	4	4	2	4	3	2	3	2	2	3	3	4	4
189	7	33	4	5	4	3	3	4	4	4	2	4	2	4	4	4	2	3	3	4	2	4	4	2	4	4	4	3	4	4	3	2	4	2	4	2	2	1	1	3	1	1
190	8	33	4	5	4	3	3	4	4	4	2	4	2	4	4	4	2	3	3	4	3	2	3	4	3	5	4	5	5	4	5	4	3	5	5	3	5	1	2	3	2	2
191	1	34	4	4	4	5	3	4	4	3	4	3	4	4	4	3	1	3	3	4	3	4	3	4	3	4	3	3	5	3	3	5	5	4	4	4	4	2	2	3	2	2
192	2	34	4	4	4	5	3	4	4	3	4	3	4	4	4	3	1	3	3	4	4	4	4	5	3	4	4	3	4	4	3	3	4	4	3	5	4	1	3	3	3	3
193	3	34	4	4	4	5	3	4	4	3	4	3	4	4	4	3	1	3	3	4	3	5	5	5	3	4	5	5	4	4	4	2	2	2	2	2	2	1	2	3	2	2
194	4	34	4	4	4	5	3	4	4	3	4	3	4	4	4	3	1	3	3	4	4	3	4	3	4	5	5	5	5	5	5	3	2	3	3	2	3	2	2	3	2	2
195	5	34	4	4	4	5	3	4	4	3	4	3	4	4	4	3	1	3	3	4	3	3	5	5	4	4	4	3	4	4	4	3	2	2	2	2	2	1	2	3	2	2
196	6	34	4	4	4	5	3	4	4	3	4	3	4	4	4	3	1	3	3	4	3	4	5	5	4	4	4	4	4	4	4	2	4	4	3	2	3	1	1	3	1	1
197	7	34	4	4	4	5	3	4	4	3	4	3	4	4	4	3	1	3	3	4	5	4	4	4	5	4	4	4	3	5	4	3	5	4	3	4	4	2	2	3	2	2
198	8	34	4	4	4	5	3	4	4	3	4	3	4	4	4	3	1	3	3	4	4	3	4	4	5	4	4	4	5	4	5	3	3	3	4	2	3	1	3	2	3	3
199	1	35	5	5	5	3	5	5	3	3	5	4	3	5	4	3	1	3	3	3	3	3	4	5	4	3	4	3	4	3	5	2	1	1	1	1	1	2	3	3	4	3
200	2	35	5	5	5	3	5	5	3	3	5	4	3	5	4	3	1	3	3	3	3	2	3	3	4	3	3	5	4	3	3	2	3	3	4	4	4	2	2	3	3	3
201	3	35	5	5	5	3	5	5	3	3	5	4	3	5	4	3	1	3	3	3	4	4	3	2	5	3	3	3	3	4	5	3	1	2	1	3	3	2	2	3	3	3
202	4	35	5	5	5	3	5	5	3	3	5	4	3	5	4	3	1	3	3	3	4	5	4	5	3	4	3	4	5	4	3	2	2	3	2	2	3	1	2	3	2	2
203	5	35	5	5	5	3	5	5	3	3	5	4	3	5	4	3	1	3	3	3	5	4	5	4	4	3	3	4	3	5	3	3	3	2	2	2	3	1	3	2	3	3
204	6	35	5	5	5	3	5	5	3	3	5	4	3	5	4	3	1	3	3	3	4	2	2	3	5	4	5	4	4	5	3	3	4	2	4	4	3	2	2	3	2	2
205	7	35	5	5	5	3	5	5	3	3	5	4	3	5	4	3	1	3	3	3	3	3	5	5	4	5	4	4	5	3	5	3	1	1	3	1	1	2	3	3	3	3
206	8	35	5	5	5	3	5	5	3	3	5	4	3	5	4	3	1	3	3	3	2	3	3	1	5	4	5	5	3	3	4	4	4	3	3	2	3	2	1	3	1	1
207	1	36	5	5	5	5	4	4	5	5	5	4	4	4	5	5	1	4	3	4	5	4	5	5	5	5	5	5	5	5	4	2	2	1	1	2	1	1	4	2	4	4
208	2	36	5	5	5	5	4	4	5	5	5	4	4	4	5	5	1	4	3	4	5	4	4	5	4	4	4	3	4	4	4	3	1	1	3	2	2	1	3	3	4	3
209	3	36	5	5	5	5	4	4	5	5	5	4	4	4	5	5	1	4	3	4	3	3	3	3	4	4	4	4	3	4	4	3	2	2	1	2	3	1	4	2	4	4
210	4	36	5	5	5	5	4	4	5	5	5	4	4	4	5	5	1	4	3	4	3	3	4	4	4	4	4	4	4	4	4	5	4	5	4	4	4	2	1	3	1	1
211	5	36	5	5	5	5	4	4	5	5	5	4	4	4	5	5	1	4	3	4	3	5	4	5	4	3	3	3	3	3	3	2	2	2	4	4	3	1	2	3	2	2
212	6	36	5	5	5	5	4	4	5	5	5	4	4	4	5	5	1	4	3	4	4	5	5	4	5	4	5	5	3	3	4	5	3	3	3	4	5	2	2	3	3	2
213	7	36	5	5	5	5	4	4	5	5	5	4	4	4	5	5	1	4	3	4	4	4	3	4	4	4	3	4	4	4	4	2	2	2	4	2	2	1	1	3	1	1
214	8	36	5	5	5	5	4	4	5	5	5	4	4	4	5	5	1	4	3	4	3	4	4	4	3	4	3	4	3	4	3	2	3	3	4	3	2	1	3	3	3	3
215	1	37	2	4	4	2	2	2	2	2	2	4	2	4	2	3	1	4	2	4	4	4	3	5	4	4	3	4	4	4	4	1	2	3	2	3	3	1	2	3	2	2
216	2	37	2	4	4	2	2	2	2	2	2	4	2	4	2	3	1	4	2	4	5	5	5	5	3	3	5	3	3	4	5	4	2	2	2	2	3	1	2	3	3	2
217	3	37	2	4	4	2	2	2	2	2	2	4	2	4	2	3	1	4	2	4	4	4	4	4	5	3	5	3	5	4	4	1	1	1	1	1	1	1	4	2	4	3
218	4	37	2	4	4	2	2	2	2	2	2	4	2	4	2	3	1	4	2	4	5	5	4	5	4	5	4	3	5	3	3	5	3	4	3	3	3	2	1	3	1	1
219	5	37	2	4	4	2	2	2	2	2	2	4	2	4	2	3	1	4	2	4	4	4	4	4	4	3	3	4	5	4	3	4	4	3	5	5	3	2	2	3	3	2
220	1	38	3	3	3	3	2	4	3	3	3	3	3	3	2	3	2	4	3	4	5	5	5	5	1	1	2	1	3	3	1	3	3	4	5	3	3	2	2	3	3	3
221	2	38	3	3	3	3	2	4	3	3	3	3	3	3	2	3	2	4	3	4	3	4	4	5	4	4	3	5	3	3	5	3	1	2	2	2	2	2	2	3	3	3
222	3	38	3	3	3	3	2	4	3	3	3	3	3	3	2	3	2	4	3	4	3	4	4	4	2	2	2	3	2	2	2	3	3	2	3	3	4	1	2	3	3	2
223	4	38	3	3	3	3	2	4	3	3	3	3	3	3	2	3	2	4	3	4	5	4	5	5	3	3	1	2	2	3	1	2	2	2	3	4	2	1	3	3	4	3
224	5	38	3	3	3	3	2	4	3	3	3	3	3	3	2	3	2	4	3	4	5	5	5	4	2	2	2	1	2	3	2	4	4	2	2	2	2	2	3	3	3	3
225	6	38	3	3	3	3	2	4	3	3	3	3	3	3	2	3	2	4	3	4	5	4	5	4	3	3	1	1	3	3	2	5	5	5	5	5	4	1	4	2	4	4
226	1	39	4	3	4	1	2	2	2	3	1	2	1	1	1	3	1	4	2	4	4	2	2	2	2	4	4	3	2	4	4	3	2	2	3	3	3	1	3	3	4	4
227	2	39	4	3	4	1	2	2	2	3	1	2	1	1	1	3	1	4	2	4	3	2	2	2	2	1	1	3	1	1	1	5	5	5	5	5	5	1	2	3	2	2
228	3	39	4	3	4	1	2	2	2	3	1	2	1	1	1	3	1	4	2	4	4	3	5	3	3	1	1	1	1	1	1	3	4	3	5	5	4	2	2	3	3	2
229	1	40	5	4	5	4	4	5	5	5	5	5	5	5	5	5	2	4	3	4	5	5	5	5	3	4	5	4	3	5	3	3	3	3	2	2	2	1	1	3	1	1
230	2	40	5	4	5	4	4	5	5	5	5	5	5	5	5	5	2	4	3	4	3	3	4	4	3	3	5	5	4	4	5	1	1	1	1	1	1	2	3	2	4	4
231	3	40	5	4	5	4	4	5	5	5	5	5	5	5	5	5	2	4	3	4	3	4	4	4	5	3	4	4	3	4	5	2	4	4	3	4	4	2	2	3	3	2
232	4	40	5	4	5	4	4	5	5	5	5	5	5	5	5	5	2	4	3	4	5	5	5	5	4	5	5	4	5	3	5	1	1	1	2	2	1	2	2	3	3	3
233	5	40	5	4	5	4	4	5	5	5	5	5	5	5	5	5	2	4	3	4	5	5	5	4	3	4	4	4	5	4	4	4	2	2	4	2	4	2	4	3	4	4
234	1	41	3	4	3	2	2	3	4	2	2	4	3	3	2	4	1	4	3	4	5	3	5	4	3	4	4	3	4	4	3	4	3	4	2	2	2	2	2	3	2	2
235	2	41	3	4	3	2	2	3	4	2	2	4	3	3	2	4	1	4	3	4	5	4	4	5	4	4	4	4	4	4	4	3	2	2	2	3	3	2	2	3	2	2
236	3	41	3	4	3	2	2	3	4	2	2	4	3	3	2	4	1	4	3	4	5	5	5	5	5	5	5	5	5	5	5	4	4	3	3	3	3	1	2	3	2	2
237	4	41	3	4	3	2	2	3	4	2	2	4	3	3	2	4	1	4	3	4	4	4	4	4	4	4	4	4	4	4	4	1	2	3	1	3	2	2	3	2	4	3
238	5	41	3	4	3	2	2	3	4	2	2	4	3	3	2	4	1	4	3	4	4	4	4	4	4	4	3	4	4	4	4	4	4	4	4	3	2	1	1	3	1	1
239	1	42	3	3	4	3	3	1	3	1	3	2	2	1	3	3	2	3	3	4	2	2	2	1	3	5	4	4	3	3	4	2	2	4	4	4	3	2	1	3	2	2
240	2	42	3	3	4	3	3	1	3	1	3	2	2	1	3	3	2	3	3	4	4	4	4	3	4	3	4	5	5	3	3	3	4	4	4	3	4	1	1	3	1	1
241	3	42	3	3	4	3	3	1	3	1	3	2	2	1	3	3	2	3	3	4	5	4	5	5	5	4	3	3	4	5	3	2	2	1	1	2	2	1	1	3	1	1
242	4	42	3	3	4	3	3	1	3	1	3	2	2	1	3	3	2	3	3	4	5	4	3	3	4	3	4	3	3	5	5	2	4	4	4	2	3	1	4	3	4	3
243	5	42	3	3	4	3	3	1	3	1	3	2	2	1	3	3	2	3	3	4	3	2	4	2	3	5	5	4	5	5	3	3	3	3	1	1	3	2	2	3	2	2
244	6	42	3	3	4	3	3	1	3	1	3	2	2	1	3	3	2	3	3	4	5	4	5	4	4	4	5	3	3	4	4	1	2	2	2	2	2	1	1	3	1	1
245	7	42	3	3	4	3	3	1	3	1	3	2	2	1	3	3	2	3	3	4	5	5	5	4	3	4	5	5	4	3	4	3	3	2	3	1	3	1	2	3	3	2
246	8	42	3	3	4	3	3	1	3	1	3	2	2	1	3	3	2	3	3	4	3	3	2	2	3	4	5	5	3	3	4	3	2	2	3	2	2	1	2	3	2	2
247	1	43	3	1	1	4	4	3	4	4	5	5	5	4	4	3	1	4	3	3	2	3	4	2	5	3	4	4	4	4	4	4	4	4	3	3	4	2	2	3	2	2
248	2	43	3	1	1	4	4	3	4	4	5	5	5	4	4	3	1	4	3	3	2	2	2	2	4	3	4	4	3	2	4	5	4	5	5	4	5	1	2	3	3	2
249	3	43	3	1	1	4	4	3	4	4	5	5	5	4	4	3	1	4	3	3	2	4	2	2	2	2	2	2	1	1	2	4	4	4	4	4	4	1	3	2	4	4
250	4	43	3	1	1	4	4	3	4	4	5	5	5	4	4	3	1	4	3	3	4	5	5	4	3	4	2	3	3	4	2	4	3	3	4	4	4	1	4	2	4	4
251	5	43	3	1	1	4	4	3	4	4	5	5	5	4	4	3	1	4	3	3	4	3	3	3	3	2	3	3	2	2	2	4	4	4	4	3	4	1	3	2	4	4
252	6	43	3	1	1	4	4	3	4	4	5	5	5	4	4	3	1	4	3	3	2	3	3	2	3	4	2	4	3	3	2	3	4	5	4	3	5	1	2	3	3	3
253	7	43	3	1	1	4	4	3	4	4	5	5	5	4	4	3	1	4	3	3	2	4	2	2	2	3	2	3	2	4	2	5	4	4	4	5	5	1	1	3	1	1
254	8	43	3	1	1	4	4	3	4	4	5	5	5	4	4	3	1	4	3	3	5	4	5	5	2	1	1	1	1	2	1	4	4	4	4	4	4	2	3	3	4	4
255	9	43	3	1	1	4	4	3	4	4	5	5	5	4	4	3	1	4	3	3	4	2	4	4	2	2	4	2	2	2	3	4	4	4	4	4	3	1	3	3	4	4
256	1	44	4	4	4	3	3	3	3	4	5	5	5	3	3	4	1	3	3	3	5	5	5	5	5	5	4	4	4	5	5	1	1	1	1	1	2	1	1	3	1	1
257	2	44	4	4	4	3	3	3	3	4	5	5	5	3	3	4	1	3	3	3	4	4	4	4	4	4	4	4	4	4	4	4	2	2	2	2	2	1	3	2	4	3
258	3	44	4	4	4	3	3	3	3	4	5	5	5	3	3	4	1	3	3	3	3	1	2	2	4	4	4	3	4	4	4	3	4	4	4	3	2	1	2	3	2	2
259	4	44	4	4	4	3	3	3	3	4	5	5	5	3	3	4	1	3	3	3	4	2	4	4	4	4	3	4	4	5	4	3	2	4	4	4	4	1	1	3	1	1
260	5	44	4	4	4	3	3	3	3	4	5	5	5	3	3	4	1	3	3	3	4	4	4	4	4	3	4	4	3	4	3	4	2	2	2	4	3	1	1	3	1	1
261	6	44	4	4	4	3	3	3	3	4	5	5	5	3	3	4	1	3	3	3	2	2	2	2	4	3	4	3	4	4	4	1	2	2	1	2	2	2	2	3	3	3
262	7	44	4	4	4	3	3	3	3	4	5	5	5	3	3	4	1	3	3	3	5	4	4	4	5	5	5	5	5	5	5	2	1	1	1	1	1	1	1	3	1	1
263	1	45	5	5	5	5	5	5	5	5	5	5	5	5	5	5	2	4	3	4	5	5	5	5	4	5	4	5	5	4	4	1	1	1	1	1	1	2	3	3	4	3
264	2	45	5	5	5	5	5	5	5	5	5	5	5	5	5	5	2	4	3	4	3	4	4	4	4	4	4	3	4	4	3	4	3	2	4	4	4	2	2	3	2	2
265	3	45	5	5	5	5	5	5	5	5	5	5	5	5	5	5	2	4	3	4	4	3	4	4	4	4	4	4	5	3	5	2	3	1	2	2	1	2	4	2	4	4
266	4	45	5	5	5	5	5	5	5	5	5	5	5	5	5	5	2	4	3	4	5	4	4	4	4	4	4	3	3	3	4	5	4	5	5	3	4	1	3	2	3	3
267	5	45	5	5	5	5	5	5	5	5	5	5	5	5	5	5	2	4	3	4	4	4	4	4	3	4	3	4	4	4	4	4	4	4	4	4	2	1	2	3	2	2
268	6	45	5	5	5	5	5	5	5	5	5	5	5	5	5	5	2	4	3	4	4	4	4	3	4	4	4	4	4	5	4	2	2	2	4	2	4	1	3	3	3	3
269	7	45	5	5	5	5	5	5	5	5	5	5	5	5	5	5	2	4	3	4	4	4	4	4	3	4	4	4	4	4	4	1	2	1	1	1	1	1	3	3	4	3
270	8	45	5	5	5	5	5	5	5	5	5	5	5	5	5	5	2	4	3	4	5	5	5	5	5	5	3	5	3	3	5	2	3	2	2	1	2	2	2	3	2	2
271	1	46	4	4	4	4	5	4	4	4	5	3	5	5	4	4	1	4	3	4	3	2	2	2	5	4	4	3	4	5	4	2	2	3	3	4	2	2	2	3	3	3
272	2	46	4	4	4	4	5	4	4	4	5	3	5	5	4	4	1	4	3	4	3	2	3	4	3	3	3	3	3	2	4	4	3	3	4	4	4	1	2	3	2	2
273	3	46	4	4	4	4	5	4	4	4	5	3	5	5	4	4	1	4	3	4	3	4	3	3	3	2	2	2	4	3	2	4	4	4	4	4	2	1	2	3	2	2
274	4	46	4	4	4	4	5	4	4	4	5	3	5	5	4	4	1	4	3	4	4	4	4	4	1	2	1	3	1	2	2	4	3	3	4	4	4	2	3	2	4	4
275	5	46	4	4	4	4	5	4	4	4	5	3	5	5	4	4	1	4	3	4	2	3	4	3	4	4	4	3	4	2	4	2	2	2	3	3	4	2	1	3	1	1
276	6	46	4	4	4	4	5	4	4	4	5	3	5	5	4	4	1	4	3	4	4	2	4	2	4	4	4	4	4	4	4	4	4	3	2	4	4	2	4	2	4	4
277	7	46	4	4	4	4	5	4	4	4	5	3	5	5	4	4	1	4	3	4	4	5	5	4	2	4	3	4	4	3	3	4	4	5	3	5	3	2	2	3	3	3
278	8	46	4	4	4	4	5	4	4	4	5	3	5	5	4	4	1	4	3	4	3	4	5	4	3	4	4	4	4	4	2	4	4	4	3	4	5	1	2	3	3	2
279	1	47	1	1	3	2	2	2	1	1	2	3	2	2	3	2	1	3	3	4	2	2	3	3	2	2	2	2	2	2	2	3	4	4	3	4	4	2	1	3	1	1
280	2	47	1	1	3	2	2	2	1	1	2	3	2	2	3	2	1	3	3	4	2	1	1	1	2	2	3	2	3	3	4	2	2	3	2	2	2	2	1	3	1	1
281	3	47	1	1	3	2	2	2	1	1	2	3	2	2	3	2	1	3	3	4	3	1	2	1	4	4	4	4	4	2	3	4	2	4	4	3	4	2	2	3	3	2
282	4	47	1	1	3	2	2	2	1	1	2	3	2	2	3	2	1	3	3	4	2	3	2	2	4	4	4	2	2	2	3	3	3	3	4	3	5	1	3	3	3	3
283	5	47	1	1	3	2	2	2	1	1	2	3	2	2	3	2	1	3	3	4	1	1	1	1	3	2	3	3	3	3	2	4	5	5	3	4	5	2	2	3	2	2
284	1	48	5	3	4	3	4	3	4	4	2	4	2	4	3	4	2	4	2	4	4	4	4	3	5	4	4	4	4	4	5	2	4	4	4	2	4	2	3	3	3	3
285	2	48	5	3	4	3	4	3	4	4	2	4	2	4	3	4	2	4	2	4	5	4	5	5	3	3	5	3	4	5	4	4	2	2	3	2	2	1	2	3	2	2
286	3	48	5	3	4	3	4	3	4	4	2	4	2	4	3	4	2	4	2	4	5	5	4	5	5	4	4	5	4	5	5	1	2	2	1	2	2	2	2	3	2	2
287	4	48	5	3	4	3	4	3	4	4	2	4	2	4	3	4	2	4	2	4	4	5	4	4	3	4	4	4	3	4	4	3	1	3	2	2	2	1	2	3	3	2
288	5	48	5	3	4	3	4	3	4	4	2	4	2	4	3	4	2	4	2	4	2	4	2	2	4	4	4	4	4	4	4	3	4	2	4	4	3	2	3	2	3	3
289	6	48	5	3	4	3	4	3	4	4	2	4	2	4	3	4	2	4	2	4	4	4	4	4	4	4	4	5	5	4	4	1	2	1	1	1	1	1	1	3	1	1
290	7	48	5	3	4	3	4	3	4	4	2	4	2	4	3	4	2	4	2	4	2	2	2	4	4	4	4	4	4	4	4	4	2	4	2	4	4	1	2	3	3	2
291	1	49	4	4	4	5	5	4	5	5	5	5	3	4	3	5	1	4	2	4	4	4	4	3	5	5	5	5	5	4	3	2	2	2	1	1	1	1	2	3	3	2
292	2	49	4	4	4	5	5	4	5	5	5	5	3	4	3	5	1	4	2	4	1	2	3	2	5	3	5	5	5	3	3	1	3	3	2	2	3	2	2	3	2	2
293	3	49	4	4	4	5	5	4	5	5	5	5	3	4	3	5	1	4	2	4	4	3	5	4	3	5	3	3	4	3	3	4	4	4	4	3	4	2	2	3	2	2
294	1	50	1	1	2	3	4	3	2	3	3	2	3	4	3	4	2	3	3	3	4	3	5	4	3	1	3	3	1	1	2	3	4	3	4	4	4	2	3	2	3	3
295	2	50	1	1	2	3	4	3	2	3	3	2	3	4	3	4	2	3	3	3	4	3	4	4	2	3	3	4	2	2	2	2	2	3	2	4	2	1	2	3	3	2
296	3	50	1	1	2	3	4	3	2	3	3	2	3	4	3	4	2	3	3	3	2	1	2	2	2	3	2	3	2	1	3	4	3	4	3	5	4	1	3	2	4	4
297	4	50	1	1	2	3	4	3	2	3	3	2	3	4	3	4	2	3	3	3	2	2	4	4	3	2	4	4	4	2	4	1	3	1	1	3	3	1	1	3	1	1
298	5	50	1	1	2	3	4	3	2	3	3	2	3	4	3	4	2	3	3	3	2	2	1	2	1	2	2	2	2	2	2	4	4	4	5	4	4	2	2	3	3	2
299	1	51	3	3	3	2	4	4	2	2	2	2	2	2	2	2	2	2	3	4	4	4	3	2	4	3	4	4	4	4	3	2	2	3	4	2	2	1	3	3	4	4
300	2	51	3	3	3	2	4	4	2	2	2	2	2	2	2	2	2	2	3	4	4	5	4	5	1	1	2	2	2	2	2	5	5	5	4	4	5	2	2	3	3	3
301	3	51	3	3	3	2	4	4	2	2	2	2	2	2	2	2	2	2	3	4	3	3	3	3	1	2	3	1	1	1	3	3	3	3	4	5	3	2	2	3	2	2
302	4	51	3	3	3	2	4	4	2	2	2	2	2	2	2	2	2	2	3	4	3	4	2	3	3	1	3	2	2	2	2	4	5	5	4	3	5	2	1	3	1	1
303	5	51	3	3	3	2	4	4	2	2	2	2	2	2	2	2	2	2	3	4	2	2	3	2	5	5	5	3	5	3	3	2	2	2	2	2	2	1	2	3	2	2
304	6	51	3	3	3	2	4	4	2	2	2	2	2	2	2	2	2	2	3	4	2	2	3	2	5	4	4	4	4	4	3	5	4	4	3	4	4	1	1	3	1	1
305	7	51	3	3	3	2	4	4	2	2	2	2	2	2	2	2	2	2	3	4	4	5	3	5	2	3	3	3	3	3	3	5	5	5	5	5	4	2	2	3	3	3
306	8	51	3	3	3	2	4	4	2	2	2	2	2	2	2	2	2	2	3	4	3	3	4	3	2	2	1	1	1	3	1	4	4	4	4	5	4	1	2	3	2	2
307	1	52	1	2	1	4	4	4	2	4	4	3	2	2	3	4	1	4	3	4	3	2	3	2	3	3	2	3	3	3	2	2	3	4	2	4	2	2	2	3	2	2
308	2	52	1	2	1	4	4	4	2	4	4	3	2	2	3	4	1	4	3	4	2	2	2	2	4	4	4	4	4	4	3	4	4	4	4	4	4	2	1	3	1	1
309	3	52	1	2	1	4	4	4	2	4	4	3	2	2	3	4	1	4	3	4	2	2	4	4	4	2	4	2	4	2	4	4	3	2	4	4	4	2	1	3	1	1
310	1	53	1	2	1	3	2	2	2	2	3	1	2	2	3	3	1	4	2	4	4	2	3	4	2	2	2	2	2	4	4	4	3	2	2	2	4	1	1	3	1	1
311	2	53	1	2	1	3	2	2	2	2	3	1	2	2	3	3	1	4	2	4	3	2	2	2	4	2	3	4	4	4	4	4	4	2	2	2	2	1	2	3	2	2
312	3	53	1	2	1	3	2	2	2	2	3	1	2	2	3	3	1	4	2	4	2	4	4	2	2	2	2	3	2	2	1	2	3	4	4	2	3	1	2	3	2	2
313	4	53	1	2	1	3	2	2	2	2	3	1	2	2	3	3	1	4	2	4	4	3	2	2	2	4	4	2	4	2	2	4	2	3	2	4	4	2	3	2	4	4
314	5	53	1	2	1	3	2	2	2	2	3	1	2	2	3	3	1	4	2	4	3	5	3	5	1	1	2	1	1	1	1	5	4	4	4	4	4	2	1	3	1	1
315	6	53	1	2	1	3	2	2	2	2	3	1	2	2	3	3	1	4	2	4	4	4	3	3	4	4	5	4	4	4	4	4	5	5	5	5	5	1	3	2	3	3
316	7	53	1	2	1	3	2	2	2	2	3	1	2	2	3	3	1	4	2	4	4	4	2	4	2	4	2	3	3	4	2	2	4	4	4	4	4	1	3	2	4	4
317	8	53	1	2	1	3	2	2	2	2	3	1	2	2	3	3	1	4	2	4	2	2	3	4	4	5	4	5	3	4	5	4	4	4	4	5	4	2	4	2	4	4
318	1	54	3	2	2	3	4	5	4	4	5	3	3	3	3	4	1	4	3	4	2	2	2	2	2	2	4	4	2	4	4	3	2	3	4	4	3	1	2	3	2	2
319	2	54	3	2	2	3	4	5	4	4	5	3	3	3	3	4	1	4	3	4	1	3	1	3	1	3	1	3	1	1	1	5	5	5	5	5	5	2	2	3	3	3
320	3	54	3	2	2	3	4	5	4	4	5	3	3	3	3	4	1	4	3	4	3	3	2	2	2	1	3	3	2	3	3	4	3	3	5	3	3	1	2	3	2	2
321	4	54	3	2	2	3	4	5	4	4	5	3	3	3	3	4	1	4	3	4	1	2	2	1	1	3	1	2	1	3	1	2	4	2	4	2	2	2	4	2	4	4
322	5	54	3	2	2	3	4	5	4	4	5	3	3	3	3	4	1	4	3	4	1	2	2	2	1	1	1	1	1	1	1	5	5	4	5	5	5	1	3	2	4	4
323	6	54	3	2	2	3	4	5	4	4	5	3	3	3	3	4	1	4	3	4	2	2	2	2	5	4	4	4	5	5	5	2	1	1	2	3	3	1	3	2	3	3
324	7	54	3	2	2	3	4	5	4	4	5	3	3	3	3	4	1	4	3	4	2	1	2	1	1	1	1	2	1	1	1	3	3	4	3	4	4	1	1	3	1	1
325	8	54	3	2	2	3	4	5	4	4	5	3	3	3	3	4	1	4	3	4	1	1	1	1	1	1	1	1	1	1	1	4	4	5	5	4	4	1	2	3	2	2
326	1	55	3	4	5	3	3	4	3	3	3	3	4	4	4	4	1	4	3	3	2	4	2	3	4	4	4	4	4	4	4	2	1	3	1	1	1	1	2	3	3	3
327	2	55	3	4	5	3	3	4	3	3	3	3	4	4	4	4	1	4	3	3	3	4	2	4	4	4	4	4	5	4	3	2	3	2	2	2	4	2	1	3	2	2
328	3	55	3	4	5	3	3	4	3	3	3	3	4	4	4	4	1	4	3	3	4	4	4	2	5	3	4	5	3	4	3	2	2	2	2	2	2	1	4	3	4	4
329	4	55	3	4	5	3	3	4	3	3	3	3	4	4	4	4	1	4	3	3	4	3	3	3	3	5	5	3	4	3	3	3	4	4	3	3	2	1	3	2	4	3
330	5	55	3	4	5	3	3	4	3	3	3	3	4	4	4	4	1	4	3	3	4	4	5	4	5	5	4	4	4	5	4	2	1	2	1	2	2	2	1	3	2	2
331	6	55	3	4	5	3	3	4	3	3	3	3	4	4	4	4	1	4	3	3	2	2	3	3	4	3	4	3	4	3	5	3	3	3	1	2	1	1	2	3	3	2
332	7	55	3	4	5	3	3	4	3	3	3	3	4	4	4	4	1	4	3	3	4	5	5	4	3	4	4	3	5	5	4	3	3	4	3	3	4	2	2	3	2	2
333	8	55	3	4	5	3	3	4	3	3	3	3	4	4	4	4	1	4	3	3	1	2	1	2	3	4	4	4	4	3	4	2	2	2	2	2	4	2	2	3	3	3
334	1	56	3	4	4	4	3	2	3	4	4	4	4	4	4	4	1	4	3	4	2	4	2	3	4	4	5	3	3	5	5	4	2	3	2	3	2	1	3	2	4	3
335	2	56	3	4	4	4	3	2	3	4	4	4	4	4	4	4	1	4	3	4	3	2	2	3	4	4	5	3	4	3	3	5	4	3	5	3	3	1	2	3	3	3
336	3	56	3	4	4	4	3	2	3	4	4	4	4	4	4	4	1	4	3	4	2	2	4	2	3	4	4	4	3	5	5	4	4	2	2	4	2	1	2	3	2	2
337	4	56	3	4	4	4	3	2	3	4	4	4	4	4	4	4	1	4	3	4	4	4	5	5	4	5	4	5	3	4	5	2	1	1	2	2	2	2	2	3	2	2
338	5	56	3	4	4	4	3	2	3	4	4	4	4	4	4	4	1	4	3	4	4	4	4	3	4	4	5	3	3	3	3	3	4	5	3	4	4	2	3	2	4	4
339	1	57	3	1	1	2	2	2	3	2	2	2	2	3	2	2	2	3	3	4	2	2	2	2	4	4	2	3	4	3	4	2	2	3	4	2	3	1	2	3	3	3
340	2	57	3	1	1	2	2	2	3	2	2	2	2	3	2	2	2	3	3	4	1	1	3	2	3	4	3	3	2	2	3	4	4	4	5	3	3	2	1	3	1	1
341	3	57	3	1	1	2	2	2	3	2	2	2	2	3	2	2	2	3	3	4	2	2	3	2	2	4	2	4	2	2	3	4	4	2	2	4	2	2	2	3	3	2
342	4	57	3	1	1	2	2	2	3	2	2	2	2	3	2	2	2	3	3	4	1	1	1	1	1	1	2	1	1	1	1	4	4	4	3	4	4	2	2	3	2	2
343	5	57	3	1	1	2	2	2	3	2	2	2	2	3	2	2	2	3	3	4	2	2	2	2	3	4	4	3	2	2	2	4	3	3	4	4	3	1	1	3	1	1
344	1	58	5	5	4	1	2	2	2	2	1	2	2	1	2	1	2	3	3	4	3	2	1	2	2	2	4	2	4	2	4	2	1	1	1	2	2	1	2	3	2	2
345	2	58	5	5	4	1	2	2	2	2	1	2	2	1	2	1	2	3	3	4	2	2	2	1	4	2	3	4	4	3	3	5	4	3	4	3	3	1	2	3	2	2
346	3	58	5	5	4	1	2	2	2	2	1	2	2	1	2	1	2	3	3	4	2	2	2	2	3	1	1	2	2	2	2	1	2	2	2	2	2	2	3	3	4	4
347	1	59	3	5	5	4	3	3	3	3	3	5	5	3	4	5	1	4	3	4	5	5	3	5	4	4	3	3	3	5	3	4	4	4	2	2	2	1	2	3	3	2
348	2	59	3	5	5	4	3	3	3	3	3	5	5	3	4	5	1	4	3	4	2	4	4	4	5	4	4	3	3	3	4	2	2	1	1	2	1	2	2	3	3	2
349	3	59	3	5	5	4	3	3	3	3	3	5	5	3	4	5	1	4	3	4	4	5	5	5	5	5	4	4	4	4	5	3	3	2	3	3	3	1	3	2	4	3
350	4	59	3	5	5	4	3	3	3	3	3	5	5	3	4	5	1	4	3	4	2	2	2	2	5	3	4	3	3	4	4	2	4	2	2	2	2	2	1	3	1	1
351	5	59	3	5	5	4	3	3	3	3	3	5	5	3	4	5	1	4	3	4	3	2	3	3	5	4	5	5	5	4	3	2	2	2	2	2	2	2	1	3	2	2
352	6	59	3	5	5	4	3	3	3	3	3	5	5	3	4	5	1	4	3	4	2	2	2	3	5	5	3	5	5	4	3	1	1	2	1	1	1	1	4	2	4	4
353	7	59	3	5	5	4	3	3	3	3	3	5	5	3	4	5	1	4	3	4	4	2	2	4	3	3	5	3	4	3	4	4	2	4	4	3	2	2	2	3	2	2
354	1	60	4	4	4	2	3	4	2	4	3	4	2	3	4	4	1	4	3	4	2	2	2	2	4	4	3	4	3	3	3	2	2	2	3	3	4	2	2	3	3	3
355	2	60	4	4	4	2	3	4	2	4	3	4	2	3	4	4	1	4	3	4	4	4	3	5	3	3	3	4	5	3	3	5	4	4	5	5	4	1	2	3	2	2
356	3	60	4	4	4	2	3	4	2	4	3	4	2	3	4	4	1	4	3	4	4	2	3	3	5	3	4	4	4	4	3	4	4	2	4	3	4	2	2	3	2	2
357	4	60	4	4	4	2	3	4	2	4	3	4	2	3	4	4	1	4	3	4	2	2	2	4	5	3	3	5	4	4	4	3	3	2	3	3	3	1	3	3	3	3
358	5	60	4	4	4	2	3	4	2	4	3	4	2	3	4	4	1	4	3	4	5	5	4	3	4	4	3	4	4	5	3	1	1	1	1	1	1	2	3	2	3	3
359	6	60	4	4	4	2	3	4	2	4	3	4	2	3	4	4	1	4	3	4	5	5	3	4	5	4	4	5	3	5	4	1	1	1	3	3	1	2	2	3	2	2
360	7	60	4	4	4	2	3	4	2	4	3	4	2	3	4	4	1	4	3	4	3	4	5	5	5	3	4	4	5	4	4	2	2	2	2	2	1	2	2	3	2	2
361	8	60	4	4	4	2	3	4	2	4	3	4	2	3	4	4	1	4	3	4	2	4	2	4	5	3	3	4	4	3	5	2	2	3	2	3	2	2	2	3	2	2
362	1	61	1	3	3	4	4	3	3	3	4	2	4	3	3	3	1	4	3	4	3	4	2	4	2	2	4	3	4	2	4	4	4	4	4	3	4	1	2	3	2	2
363	2	61	1	3	3	4	4	3	3	3	4	2	4	3	3	3	1	4	3	4	1	1	1	2	1	2	1	3	3	3	2	4	3	4	4	4	4	1	3	2	4	4
364	3	61	1	3	3	4	4	3	3	3	4	2	4	3	3	3	1	4	3	4	4	4	2	2	1	2	2	3	2	2	2	4	4	4	3	4	4	2	2	3	2	2
365	4	61	1	3	3	4	4	3	3	3	4	2	4	3	3	3	1	4	3	4	4	4	4	5	2	1	2	3	3	3	1	4	5	4	3	4	4	1	1	3	2	2
366	5	61	1	3	3	4	4	3	3	3	4	2	4	3	3	3	1	4	3	4	4	4	4	4	5	3	4	5	4	4	5	3	4	4	4	4	3	2	3	2	4	4
367	6	61	1	3	3	4	4	3	3	3	4	2	4	3	3	3	1	4	3	4	2	2	2	1	5	5	4	3	3	4	3	4	4	5	4	3	3	1	1	3	1	1
368	7	61	1	3	3	4	4	3	3	3	4	2	4	3	3	3	1	4	3	4	2	1	2	2	4	4	4	3	4	4	4	4	4	4	3	4	4	1	1	3	1	1
369	8	61	1	3	3	4	4	3	3	3	4	2	4	3	3	3	1	4	3	4	4	2	3	2	4	2	2	2	4	2	2	3	4	4	3	4	4	1	3	3	4	3
370	9	61	1	3	3	4	4	3	3	3	4	2	4	3	3	3	1	4	3	4	2	1	2	3	2	3	2	2	2	2	2	3	3	4	3	4	4	2	4	2	4	4
371	10	61	1	3	3	4	4	3	3	3	4	2	4	3	3	3	1	4	3	4	2	2	2	2	3	2	1	2	2	2	2	4	4	4	4	4	4	2	2	3	2	2
372	1	62	1	1	3	5	5	5	5	5	5	5	5	5	5	5	2	4	3	4	1	1	3	2	2	2	2	3	2	4	3	2	4	2	2	4	4	1	2	3	3	2
373	2	62	1	1	3	5	5	5	5	5	5	5	5	5	5	5	2	4	3	4	1	1	1	1	1	3	2	2	2	1	1	5	4	5	5	5	5	2	2	3	2	2
374	3	62	1	1	3	5	5	5	5	5	5	5	5	5	5	5	2	4	3	4	3	2	1	3	1	1	1	1	1	3	1	5	5	5	5	5	5	1	3	3	3	3
375	4	62	1	1	3	5	5	5	5	5	5	5	5	5	5	5	2	4	3	4	3	3	1	1	1	3	3	3	1	3	2	3	3	5	4	4	3	1	2	3	2	2
376	1	63	2	1	1	2	2	2	3	2	2	3	2	2	2	3	1	4	3	4	1	1	1	2	4	4	4	4	4	4	3	3	3	3	1	3	3	2	1	3	1	1
377	2	63	2	1	1	2	2	2	3	2	2	3	2	2	2	3	1	4	3	4	2	2	2	2	2	4	4	2	2	4	2	4	3	5	3	4	4	1	2	3	3	3
378	3	63	2	1	1	2	2	2	3	2	2	3	2	2	2	3	1	4	3	4	1	3	2	3	2	2	1	2	2	2	1	4	2	4	4	4	4	1	1	3	1	1
379	4	63	2	1	1	2	2	2	3	2	2	3	2	2	2	3	1	4	3	4	2	2	2	3	2	3	4	2	2	2	4	4	3	4	4	4	2	2	2	3	2	2
380	5	63	2	1	1	2	2	2	3	2	2	3	2	2	2	3	1	4	3	4	2	2	1	1	3	3	3	3	3	2	4	4	4	3	4	4	2	1	1	3	1	1
381	1	64	3	4	3	4	2	2	3	2	4	4	3	4	4	4	2	4	2	4	4	4	2	2	3	4	4	4	4	4	4	1	2	2	1	2	1	1	2	3	2	2
382	2	64	3	4	3	4	2	2	3	2	4	4	3	4	4	4	2	4	2	4	4	4	5	4	4	4	4	4	4	4	4	3	4	4	3	2	2	1	2	3	2	2
383	3	64	3	4	3	4	2	2	3	2	4	4	3	4	4	4	2	4	2	4	3	4	4	4	4	3	4	4	3	3	4	2	3	4	4	4	4	1	3	2	3	3
384	4	64	3	4	3	4	2	2	3	2	4	4	3	4	4	4	2	4	2	4	2	4	2	2	4	4	4	3	4	4	5	2	2	3	3	3	4	2	2	3	2	2
385	5	64	3	4	3	4	2	2	3	2	4	4	3	4	4	4	2	4	2	4	2	2	3	2	3	4	5	3	3	5	5	3	4	4	4	4	4	2	1	3	1	1
386	6	64	3	4	3	4	2	2	3	2	4	4	3	4	4	4	2	4	2	4	5	4	4	3	4	3	3	4	4	4	3	5	5	3	5	3	3	2	3	2	4	4
387	7	64	3	4	3	4	2	2	3	2	4	4	3	4	4	4	2	4	2	4	5	3	5	4	4	5	5	4	4	5	3	2	3	2	1	1	1	2	2	3	2	2
388	8	64	3	4	3	4	2	2	3	2	4	4	3	4	4	4	2	4	2	4	4	4	4	4	4	4	4	4	4	3	4	2	4	4	2	2	3	1	2	3	3	2
389	1	65	4	4	4	4	4	2	2	2	2	2	2	3	2	4	2	3	3	4	4	4	4	2	4	3	4	4	4	3	5	2	2	2	2	4	3	1	1	3	1	1
390	2	65	4	4	4	4	4	2	2	2	2	2	2	3	2	4	2	3	3	4	4	3	4	5	5	5	4	4	3	5	3	4	4	4	4	2	4	2	2	3	2	2
391	3	65	4	4	4	4	4	2	2	2	2	2	2	3	2	4	2	3	3	4	3	2	1	2	5	4	3	3	3	5	4	4	4	4	4	4	4	1	2	3	2	2
392	4	65	4	4	4	4	4	2	2	2	2	2	2	3	2	4	2	3	3	4	2	2	2	3	4	5	3	5	3	5	4	1	3	1	3	3	3	1	1	3	1	1
393	5	65	4	4	4	4	4	2	2	2	2	2	2	3	2	4	2	3	3	4	4	4	5	4	4	4	4	5	5	4	5	3	3	1	1	2	2	1	3	3	4	3
394	6	65	4	4	4	4	4	2	2	2	2	2	2	3	2	4	2	3	3	4	5	3	5	3	4	4	5	4	5	3	4	1	1	3	1	1	1	2	2	3	3	2
395	7	65	4	4	4	4	4	2	2	2	2	2	2	3	2	4	2	3	3	4	4	2	2	2	5	3	3	3	3	4	4	2	3	1	3	3	3	1	2	3	3	2
396	8	65	4	4	4	4	4	2	2	2	2	2	2	3	2	4	2	3	3	4	5	5	5	3	3	4	5	4	5	4	5	2	2	2	2	2	3	2	2	3	3	2
397	1	66	3	2	2	4	4	3	4	5	4	4	5	5	4	4	1	4	2	4	3	2	2	2	2	2	4	4	2	2	3	2	4	2	4	4	4	1	4	2	4	3
398	2	66	3	2	2	4	4	3	4	5	4	4	5	5	4	4	1	4	2	4	4	3	5	4	5	5	5	4	3	4	4	4	4	4	4	5	5	2	1	3	1	1
399	3	66	3	2	2	4	4	3	4	5	4	4	5	5	4	4	1	4	2	4	3	4	4	4	2	2	2	2	2	4	2	4	2	2	4	4	4	2	1	3	1	1
400	4	66	3	2	2	4	4	3	4	5	4	4	5	5	4	4	1	4	2	4	2	2	4	4	2	2	2	2	3	2	3	4	3	3	4	2	4	1	2	3	3	3
401	5	66	3	2	2	4	4	3	4	5	4	4	5	5	4	4	1	4	2	4	2	4	2	2	2	2	2	2	2	2	3	4	4	2	2	4	4	1	1	3	1	1
402	6	66	3	2	2	4	4	3	4	5	4	4	5	5	4	4	1	4	2	4	3	4	3	2	3	4	3	2	2	2	3	4	3	3	3	5	4	1	2	3	3	2
403	1	67	1	1	1	4	4	4	4	5	5	4	5	5	4	5	1	4	3	4	1	1	1	1	1	2	1	1	2	2	1	5	3	5	5	4	4	1	2	3	2	2
404	2	67	1	1	1	4	4	4	4	5	5	4	5	5	4	5	1	4	3	4	1	2	1	1	1	1	2	1	1	2	1	5	5	5	5	5	5	2	2	3	2	2
405	3	67	1	1	1	4	4	4	4	5	5	4	5	5	4	5	1	4	3	4	2	2	2	2	2	2	3	2	2	3	4	2	4	2	2	2	2	2	2	3	2	2
406	4	67	1	1	1	4	4	4	4	5	5	4	5	5	4	5	1	4	3	4	3	3	2	2	3	1	2	3	1	2	3	5	3	4	5	5	5	1	2	3	3	3
407	5	67	1	1	1	4	4	4	4	5	5	4	5	5	4	5	1	4	3	4	2	3	2	2	4	4	4	4	4	2	4	4	2	2	2	2	2	1	1	3	1	1
408	1	68	4	4	5	3	3	2	2	2	4	4	2	2	2	2	1	4	2	4	2	2	2	2	2	4	4	2	4	2	3	5	5	4	5	5	5	2	2	3	2	2
409	2	68	4	4	5	3	3	2	2	2	4	4	2	2	2	2	1	4	2	4	2	1	2	2	4	4	2	3	3	4	4	2	3	4	2	3	2	2	3	2	3	3
410	3	68	4	4	5	3	3	2	2	2	4	4	2	2	2	2	1	4	2	4	2	2	2	2	1	1	1	1	2	1	1	2	2	3	2	2	2	1	3	2	3	3
411	1	69	3	4	4	2	2	2	4	4	4	3	4	4	4	4	2	4	3	4	4	3	3	5	2	2	4	4	4	4	4	3	4	5	4	4	3	1	2	3	2	2
412	2	69	3	4	4	2	2	2	4	4	4	3	4	4	4	4	2	4	3	4	4	2	2	2	3	4	4	3	4	4	4	3	4	2	3	3	4	1	2	3	2	2
413	3	69	3	4	4	2	2	2	4	4	4	3	4	4	4	4	2	4	3	4	4	5	4	5	2	1	1	1	1	2	1	4	5	5	4	5	5	2	2	3	3	3
414	4	69	3	4	4	2	2	2	4	4	4	3	4	4	4	4	2	4	3	4	4	3	3	4	4	4	4	5	4	4	5	2	2	2	2	3	1	1	1	3	1	1
415	5	69	3	4	4	2	2	2	4	4	4	3	4	4	4	4	2	4	3	4	4	4	4	3	4	4	2	2	3	3	4	4	3	4	4	4	4	1	2	3	2	2
416	1	70	3	4	4	3	4	2	2	3	4	3	3	2	2	2	1	4	3	4	2	2	4	2	2	2	2	2	2	2	2	3	3	3	4	3	3	2	2	3	3	3
417	2	70	3	4	4	3	4	2	2	3	4	3	3	2	2	2	1	4	3	4	3	3	3	4	1	1	1	1	1	1	1	4	4	4	3	2	4	2	2	3	3	3
418	3	70	3	4	4	3	4	2	2	3	4	3	3	2	2	2	1	4	3	4	2	4	4	4	1	2	2	3	3	1	3	2	2	3	2	4	2	1	2	3	2	2
419	1	71	2	2	3	4	3	4	4	5	3	3	4	3	5	4	2	3	3	4	2	1	1	1	4	4	4	2	4	2	2	4	3	4	4	3	4	1	2	3	3	3
420	2	71	2	2	3	4	3	4	4	5	3	3	4	3	5	4	2	3	3	4	3	3	1	2	1	1	1	1	1	1	1	4	4	4	3	4	5	1	4	2	4	4
421	3	71	2	2	3	4	3	4	4	5	3	3	4	3	5	4	2	3	3	4	2	2	1	1	1	1	2	2	3	2	3	5	5	5	4	5	4	2	2	3	2	2
422	4	71	2	2	3	4	3	4	4	5	3	3	4	3	5	4	2	3	3	4	2	2	2	2	2	3	2	2	2	3	3	5	4	3	3	5	5	2	1	3	1	1
423	5	71	2	2	3	4	3	4	4	5	3	3	4	3	5	4	2	3	3	4	1	1	2	2	4	4	4	3	2	4	4	4	4	3	3	4	2	1	2	3	2	2
424	6	71	2	2	3	4	3	4	4	5	3	3	4	3	5	4	2	3	3	4	1	2	1	3	1	1	3	1	1	1	2	5	5	5	5	5	5	2	3	3	3	3
425	7	71	2	2	3	4	3	4	4	5	3	3	4	3	5	4	2	3	3	4	1	1	2	2	3	2	2	2	4	2	2	2	1	2	1	2	2	2	1	3	1	1
426	8	71	2	2	3	4	3	4	4	5	3	3	4	3	5	4	2	3	3	4	2	3	2	2	2	4	2	2	4	3	4	3	3	2	2	4	3	1	2	3	2	2
427	1	72	1	1	1	3	4	4	3	2	4	2	3	2	4	3	1	4	3	4	3	5	5	5	2	2	3	3	2	3	1	4	4	4	4	4	4	1	2	3	2	2
428	2	72	1	1	1	3	4	4	3	2	4	2	3	2	4	3	1	4	3	4	4	2	2	2	1	2	2	2	2	1	2	5	4	4	4	4	3	1	4	2	4	4
429	3	72	1	1	1	3	4	4	3	2	4	2	3	2	4	3	1	4	3	4	2	2	2	2	1	3	2	3	2	2	1	3	4	4	4	5	4	1	2	3	3	3
430	4	72	1	1	1	3	4	4	3	2	4	2	3	2	4	3	1	4	3	4	2	4	2	2	4	4	3	3	3	3	4	5	5	5	4	4	4	2	2	3	3	3
431	5	72	1	1	1	3	4	4	3	2	4	2	3	2	4	3	1	4	3	4	3	4	4	3	2	1	1	1	2	3	2	4	4	4	4	4	4	2	4	2	4	4
432	6	72	1	1	1	3	4	4	3	2	4	2	3	2	4	3	1	4	3	4	5	5	4	4	2	2	2	2	1	1	2	5	5	5	4	5	5	1	1	3	1	1
433	7	72	1	1	1	3	4	4	3	2	4	2	3	2	4	3	1	4	3	4	3	3	4	2	5	4	4	4	4	4	5	4	3	4	4	3	3	1	2	3	2	2
434	8	72	1	1	1	3	4	4	3	2	4	2	3	2	4	3	1	4	3	4	2	2	2	2	2	2	4	2	4	4	2	4	4	4	4	3	4	2	2	3	2	2
435	1	73	4	4	3	3	2	2	2	2	2	2	4	4	4	3	1	4	3	4	4	3	4	2	2	4	2	2	2	2	4	3	3	3	5	3	5	2	2	3	2	2
436	2	73	4	4	3	3	2	2	2	2	2	2	4	4	4	3	1	4	3	4	2	2	2	3	3	4	2	2	3	4	2	2	2	2	2	3	2	1	2	3	2	2
437	3	73	4	4	3	3	2	2	2	2	2	2	4	4	4	3	1	4	3	4	3	4	4	4	3	4	4	2	4	3	3	2	2	3	3	2	3	1	2	3	3	2
438	1	74	2	2	2	2	3	1	2	2	3	2	1	2	2	3	2	3	3	3	2	2	2	3	2	3	2	2	2	2	4	4	5	4	4	3	5	1	1	3	1	1
439	2	74	2	2	2	2	3	1	2	2	3	2	1	2	2	3	2	3	3	3	2	1	2	1	3	4	4	5	4	5	4	2	2	2	2	1	3	1	2	3	3	2
440	3	74	2	2	2	2	3	1	2	2	3	2	1	2	2	3	2	3	3	3	2	2	2	2	2	2	1	1	2	2	2	4	4	3	5	3	4	1	1	3	1	1
441	4	74	2	2	2	2	3	1	2	2	3	2	1	2	2	3	2	3	3	3	3	3	1	1	3	1	2	2	1	3	1	4	4	4	4	2	3	1	2	3	2	2
442	5	74	2	2	2	2	3	1	2	2	3	2	1	2	2	3	2	3	3	3	1	1	2	1	2	2	2	2	2	3	1	4	4	4	4	4	5	2	3	2	4	3
443	6	74	2	2	2	2	3	1	2	2	3	2	1	2	2	3	2	3	3	3	2	3	1	1	3	4	4	4	4	5	3	1	1	2	1	2	1	1	3	3	4	4
444	7	74	2	2	2	2	3	1	2	2	3	2	1	2	2	3	2	3	3	3	2	2	2	2	4	3	4	4	2	4	4	3	4	4	2	4	2	2	2	3	3	2
445	8	74	2	2	2	2	3	1	2	2	3	2	1	2	2	3	2	3	3	3	3	2	2	2	3	3	5	5	4	4	4	3	1	2	3	1	3	1	2	3	2	2
446	1	75	5	5	3	4	4	4	4	4	4	4	4	5	3	5	1	4	2	4	1	1	3	1	2	2	4	2	4	2	4	5	3	5	4	3	5	2	2	3	3	2
447	2	75	5	5	3	4	4	4	4	4	4	4	4	5	3	5	1	4	2	4	1	2	1	1	1	1	1	1	1	1	1	4	4	3	4	4	4	2	3	3	4	4
448	3	75	5	5	3	4	4	4	4	4	4	4	4	5	3	5	1	4	2	4	2	2	2	2	4	2	3	3	3	4	3	2	2	1	2	2	3	2	2	3	3	2
449	1	76	3	3	3	5	5	5	5	5	5	4	5	5	3	4	1	4	2	4	2	4	2	3	3	1	3	1	2	2	3	5	5	5	5	5	5	2	2	3	2	2
450	2	76	3	3	3	5	5	5	5	5	5	4	5	5	3	4	1	4	2	4	1	2	3	2	2	2	1	2	1	3	1	4	4	4	2	4	3	1	1	3	1	1
451	3	76	3	3	3	5	5	5	5	5	5	4	5	5	3	4	1	4	2	4	5	5	4	5	2	2	2	4	4	4	2	4	4	4	2	4	2	1	4	2	4	4
452	4	76	3	3	3	5	5	5	5	5	5	4	5	5	3	4	1	4	2	4	3	2	3	3	3	4	4	4	4	4	4	4	5	4	3	4	3	1	4	2	4	4
453	5	76	3	3	3	5	5	5	5	5	5	4	5	5	3	4	1	4	2	4	4	4	2	4	2	2	1	2	1	2	3	4	5	5	5	4	4	1	2	3	3	2
454	1	77	4	4	4	3	5	5	5	5	4	3	5	4	5	4	2	4	3	4	3	3	4	2	4	4	4	4	4	4	3	3	2	3	2	2	2	1	2	3	3	2
455	2	77	4	4	4	3	5	5	5	5	4	3	5	4	5	4	2	4	3	4	3	4	5	5	5	4	5	4	3	4	3	1	1	1	2	2	1	2	4	2	4	3
456	3	77	4	4	4	3	5	5	5	5	4	3	5	4	5	4	2	4	3	4	5	5	5	4	5	5	3	3	4	4	3	1	3	3	3	3	3	1	2	3	2	2
457	4	77	4	4	4	3	5	5	5	5	4	3	5	4	5	4	2	4	3	4	2	2	2	3	3	4	5	4	5	4	3	1	1	2	1	1	1	1	1	3	1	1
458	5	77	4	4	4	3	5	5	5	5	4	3	5	4	5	4	2	4	3	4	4	3	4	5	3	3	5	4	3	4	4	3	1	3	3	3	3	1	4	2	4	3
459	6	77	4	4	4	3	5	5	5	5	4	3	5	4	5	4	2	4	3	4	5	5	5	5	5	3	5	4	4	4	3	2	2	2	2	2	2	2	1	3	1	1
460	7	77	4	4	4	3	5	5	5	5	4	3	5	4	5	4	2	4	3	4	4	5	5	4	5	4	3	4	3	4	5	2	2	2	2	2	4	2	2	3	2	2
461	8	77	4	4	4	3	5	5	5	5	4	3	5	4	5	4	2	4	3	4	5	3	4	5	5	5	3	4	5	4	4	1	1	2	1	1	2	1	3	3	4	3
462	1	78	4	4	4	4	2	3	2	2	2	3	3	2	4	2	1	4	2	4	4	3	4	4	4	4	3	4	4	3	4	2	3	2	2	3	3	2	1	3	1	1
463	2	78	4	4	4	4	2	3	2	2	2	3	3	2	4	2	1	4	2	4	2	4	2	4	2	3	4	3	3	2	4	3	5	4	4	4	3	1	2	3	3	3
464	3	78	4	4	4	4	2	3	2	2	2	3	3	2	4	2	1	4	2	4	5	4	4	5	1	1	1	2	1	1	1	5	5	4	5	4	4	1	1	3	1	1
465	4	78	4	4	4	4	2	3	2	2	2	3	3	2	4	2	1	4	2	4	3	4	4	3	2	2	2	4	4	4	4	2	2	2	4	4	2	2	3	2	4	4
466	5	78	4	4	4	4	2	3	2	2	2	3	3	2	4	2	1	4	2	4	4	4	4	3	5	5	4	5	5	4	4	2	3	2	2	2	2	1	4	2	4	3
467	1	79	3	3	4	2	2	4	2	2	3	4	2	2	2	3	1	3	3	4	2	2	4	2	5	4	4	5	5	4	4	2	2	4	2	4	2	1	3	3	4	3
468	2	79	3	3	4	2	2	4	2	2	3	4	2	2	2	3	1	3	3	4	4	4	5	5	4	5	3	4	4	5	4	4	4	5	5	5	5	2	3	3	4	3
469	3	79	3	3	4	2	2	4	2	2	3	4	2	2	2	3	1	3	3	4	3	4	4	3	3	4	4	4	3	5	5	3	2	2	2	2	2	1	2	3	3	2
470	1	80	5	4	3	3	4	5	5	4	3	4	5	4	5	5	1	4	3	4	2	2	2	4	5	3	4	4	5	5	4	2	2	2	2	3	4	1	1	3	1	1
471	2	80	5	4	3	3	4	5	5	4	3	4	5	4	5	5	1	4	3	4	2	2	2	2	4	5	3	4	4	5	5	4	2	3	2	2	3	1	2	3	2	2
472	3	80	5	4	3	3	4	5	5	4	3	4	5	4	5	5	1	4	3	4	2	2	2	4	5	4	3	3	3	5	3	5	4	4	3	4	3	2	2	3	2	2
473	4	80	5	4	3	3	4	5	5	4	3	4	5	4	5	5	1	4	3	4	3	4	2	4	5	4	3	3	3	5	3	4	4	4	4	4	3	2	2	3	3	2
474	5	80	5	4	3	3	4	5	5	4	3	4	5	4	5	5	1	4	3	4	2	4	4	4	3	4	3	5	3	4	5	4	3	4	4	4	4	2	2	3	2	2
475	6	80	5	4	3	3	4	5	5	4	3	4	5	4	5	5	1	4	3	4	3	4	4	3	3	5	4	5	4	5	5	1	3	2	1	2	3	1	2	3	3	2
476	7	80	5	4	3	3	4	5	5	4	3	4	5	4	5	5	1	4	3	4	4	4	4	4	3	4	5	4	4	5	5	2	3	3	2	3	3	2	1	3	1	1
477	8	80	5	4	3	3	4	5	5	4	3	4	5	4	5	5	1	4	3	4	5	5	4	5	4	3	4	4	5	4	3	5	3	4	5	4	4	2	2	3	3	2
478	1	81	4	5	4	2	2	2	4	4	2	2	3	2	2	3	2	4	3	4	3	1	2	2	5	4	4	5	4	5	5	2	1	1	1	1	1	1	2	3	2	2
479	2	81	4	5	4	2	2	2	4	4	2	2	3	2	2	3	2	4	3	4	5	5	5	5	4	5	4	5	4	3	3	3	1	1	1	2	1	1	2	3	3	2
480	3	81	4	5	4	2	2	2	4	4	2	2	3	2	2	3	2	4	3	4	3	4	5	3	5	5	4	5	5	5	4	1	1	2	1	2	2	1	2	3	2	2
481	4	81	4	5	4	2	2	2	4	4	2	2	3	2	2	3	2	4	3	4	3	2	2	2	5	3	3	3	4	5	5	5	5	4	4	4	5	1	1	3	1	1
482	5	81	4	5	4	2	2	2	4	4	2	2	3	2	2	3	2	4	3	4	4	3	3	5	5	3	3	5	5	3	3	4	3	2	4	3	3	2	1	3	2	2
483	6	81	4	5	4	2	2	2	4	4	2	2	3	2	2	3	2	4	3	4	3	4	3	5	3	4	5	5	4	4	3	2	3	3	3	2	4	2	3	3	3	3
484	7	81	4	5	4	2	2	2	4	4	2	2	3	2	2	3	2	4	3	4	5	4	5	4	3	4	4	4	5	3	5	1	3	3	2	1	3	1	1	3	1	1
485	8	81	4	5	4	2	2	2	4	4	2	2	3	2	2	3	2	4	3	4	4	5	4	3	3	5	5	4	3	5	3	4	3	3	4	4	3	1	2	3	3	2
486	1	82	5	5	5	3	5	4	4	5	4	5	4	5	4	5	1	2	3	4	3	2	4	3	5	3	3	4	4	3	3	5	4	4	5	5	4	1	1	3	1	1
487	2	82	5	5	5	3	5	4	4	5	4	5	4	5	4	5	1	2	3	4	4	5	5	5	5	3	4	4	3	5	4	1	2	2	2	1	2	2	2	3	3	2
488	3	82	5	5	5	3	5	4	4	5	4	5	4	5	4	5	1	2	3	4	3	2	2	3	5	5	3	4	4	5	5	1	1	1	1	1	1	2	1	3	2	2
489	4	82	5	5	5	3	5	4	4	5	4	5	4	5	4	5	1	2	3	4	4	3	4	4	5	5	3	3	4	3	3	2	2	2	1	2	2	1	1	3	1	1
490	5	82	5	5	5	3	5	4	4	5	4	5	4	5	4	5	1	2	3	4	4	3	3	4	5	3	4	4	4	3	5	2	2	2	3	3	2	2	2	3	2	2
491	1	83	4	4	5	4	3	2	4	4	4	3	4	3	2	4	2	4	2	4	2	4	4	3	3	4	4	5	4	4	4	4	4	3	2	2	2	1	3	2	3	3
492	2	83	4	4	5	4	3	2	4	4	4	3	4	3	2	4	2	4	2	4	4	2	2	2	4	4	4	3	3	3	4	4	2	3	3	4	2	1	3	2	4	4
493	3	83	4	4	5	4	3	2	4	4	4	3	4	3	2	4	2	4	2	4	5	5	5	5	4	5	5	5	5	5	3	3	4	2	4	2	2	1	3	3	4	4
494	4	83	4	4	5	4	3	2	4	4	4	3	4	3	2	4	2	4	2	4	4	4	2	4	3	3	4	4	4	4	4	1	1	1	1	1	1	1	2	3	2	2
495	5	83	4	4	5	4	3	2	4	4	4	3	4	3	2	4	2	4	2	4	3	5	4	3	4	3	3	4	3	3	3	1	1	1	2	1	1	1	4	3	4	4
496	1	84	1	2	2	4	4	4	5	4	3	5	4	3	4	4	2	4	2	4	3	4	4	3	4	4	4	5	5	5	4	3	2	4	4	3	2	1	1	3	1	1
497	2	84	1	2	2	4	4	4	5	4	3	5	4	3	4	4	2	4	2	4	2	1	1	1	4	4	5	3	4	3	4	3	1	2	1	1	2	2	2	3	3	2
498	3	84	1	2	2	4	4	4	5	4	3	5	4	3	4	4	2	4	2	4	3	3	4	4	3	3	3	2	3	3	1	4	3	5	4	4	3	2	2	3	3	2
499	4	84	1	2	2	4	4	4	5	4	3	5	4	3	4	4	2	4	2	4	2	2	2	4	4	4	4	4	3	5	4	2	4	2	3	4	2	2	3	2	4	4
500	5	84	1	2	2	4	4	4	5	4	3	5	4	3	4	4	2	4	2	4	4	4	2	2	2	3	2	4	3	3	3	3	1	1	2	2	1	1	2	3	3	2
501	6	84	1	2	2	4	4	4	5	4	3	5	4	3	4	4	2	4	2	4	3	3	4	4	4	3	4	4	5	5	3	4	4	4	4	4	4	2	2	3	2	2
502	7	84	1	2	2	4	4	4	5	4	3	5	4	3	4	4	2	4	2	4	2	2	2	3	2	4	4	2	4	2	2	2	1	2	1	2	2	2	1	3	1	1
503	8	84	1	2	2	4	4	4	5	4	3	5	4	3	4	4	2	4	2	4	3	3	3	2	3	1	3	1	3	2	1	4	5	5	4	4	5	1	2	3	2	2
504	1	85	5	4	5	5	5	5	5	5	5	4	5	5	5	5	1	4	3	3	5	5	5	5	4	3	3	4	4	3	3	1	1	3	1	3	1	1	3	2	4	3
505	2	85	5	4	5	5	5	5	5	5	5	4	5	5	5	5	1	4	3	3	5	5	5	5	4	3	3	3	3	5	3	2	3	3	4	4	2	1	4	2	4	4
506	3	85	5	4	5	5	5	5	5	5	5	4	5	5	5	5	1	4	3	3	2	4	4	4	4	4	3	4	4	5	3	2	3	2	2	3	2	2	2	3	2	2
507	4	85	5	4	5	5	5	5	5	5	5	4	5	5	5	5	1	4	3	3	4	4	4	3	3	3	4	5	5	4	5	2	1	1	1	2	1	2	2	3	2	2
508	5	85	5	4	5	5	5	5	5	5	5	4	5	5	5	5	1	4	3	3	3	5	3	4	4	4	4	4	4	3	4	4	4	4	4	4	4	2	1	3	1	1
509	6	85	5	4	5	5	5	5	5	5	5	4	5	5	5	5	1	4	3	3	4	3	3	3	4	3	4	3	4	3	3	4	4	4	4	4	4	2	2	3	3	2
510	7	85	5	4	5	5	5	5	5	5	5	4	5	5	5	5	1	4	3	3	2	3	3	4	4	4	3	4	4	4	3	1	1	3	3	1	1	2	1	3	1	1
511	8	85	5	4	5	5	5	5	5	5	5	4	5	5	5	5	1	4	3	3	5	5	5	5	3	4	5	5	5	4	4	1	1	1	1	1	1	1	4	2	4	3
512	1	86	3	3	5	4	4	4	2	2	4	4	3	4	4	3	1	4	2	4	2	4	2	3	4	4	4	4	4	4	4	5	5	5	4	5	5	2	1	3	1	1
513	2	86	3	3	5	4	4	4	2	2	4	4	3	4	4	3	1	4	2	4	3	4	5	4	3	3	4	4	5	4	4	3	2	2	1	2	2	1	1	3	1	1
514	3	86	3	3	5	4	4	4	2	2	4	4	3	4	4	3	1	4	2	4	3	2	2	4	4	4	5	5	4	3	4	2	2	2	2	2	2	2	4	2	4	4
515	4	86	3	3	5	4	4	4	2	2	4	4	3	4	4	3	1	4	2	4	3	5	5	3	5	4	5	3	5	5	5	1	1	3	2	1	2	1	2	3	3	3
516	5	86	3	3	5	4	4	4	2	2	4	4	3	4	4	3	1	4	2	4	3	3	2	4	3	4	4	4	3	4	4	4	4	3	5	5	5	1	1	3	1	1
517	6	86	3	3	5	4	4	4	2	2	4	4	3	4	4	3	1	4	2	4	2	2	1	2	4	3	4	4	5	4	5	3	3	5	4	4	3	1	2	3	3	3
518	7	86	3	3	5	4	4	4	2	2	4	4	3	4	4	3	1	4	2	4	5	5	5	5	5	3	3	5	5	4	5	4	2	4	2	3	2	2	1	3	2	2
519	8	86	3	3	5	4	4	4	2	2	4	4	3	4	4	3	1	4	2	4	3	3	5	3	5	5	3	3	5	3	3	3	3	4	5	3	3	2	2	3	3	2
520	1	87	5	5	4	1	1	3	3	2	2	2	2	2	2	2	2	3	3	4	1	2	2	3	2	3	3	3	3	2	2	3	3	2	4	2	3	1	3	2	3	3
521	2	87	5	5	4	1	1	3	3	2	2	2	2	2	2	2	2	3	3	4	3	1	3	2	4	4	4	4	3	3	3	2	4	4	2	2	3	2	2	3	3	2
522	3	87	5	5	4	1	1	3	3	2	2	2	2	2	2	2	2	3	3	4	3	1	1	1	1	2	1	1	2	1	1	3	4	3	2	4	4	1	4	2	4	4
523	4	87	5	5	4	1	1	3	3	2	2	2	2	2	2	2	2	3	3	4	2	1	2	3	4	3	4	4	4	4	3	4	2	4	2	4	2	1	3	2	3	3
524	5	87	5	5	4	1	1	3	3	2	2	2	2	2	2	2	2	3	3	4	2	2	2	1	4	2	2	4	4	4	4	4	4	4	4	3	4	2	1	3	1	1
525	1	88	4	4	4	2	1	2	1	1	2	3	1	2	3	1	1	4	2	4	3	5	5	4	4	5	4	4	4	5	4	3	1	2	1	2	2	1	2	3	2	2
526	2	88	4	4	4	2	1	2	1	1	2	3	1	2	3	1	1	4	2	4	4	2	4	4	4	5	3	5	3	5	3	4	2	2	2	4	4	1	1	3	1	1
527	3	88	4	4	4	2	1	2	1	1	2	3	1	2	3	1	1	4	2	4	2	2	3	2	3	4	3	5	4	4	5	2	3	2	4	2	2	1	1	3	1	1
528	4	88	4	4	4	2	1	2	1	1	2	3	1	2	3	1	1	4	2	4	4	4	2	4	4	4	4	4	4	3	5	2	2	1	2	2	1	1	1	3	1	1
529	5	88	4	4	4	2	1	2	1	1	2	3	1	2	3	1	1	4	2	4	3	3	4	2	4	4	3	3	4	4	4	3	5	4	4	5	4	2	2	3	3	3
530	1	89	3	4	4	2	2	2	3	2	2	2	3	2	4	3	1	3	3	4	3	4	4	4	4	5	3	4	4	4	5	1	1	1	3	2	3	2	4	3	4	3
531	2	89	3	4	4	2	2	2	3	2	2	2	3	2	4	3	1	3	3	4	5	5	5	5	4	5	4	5	5	3	5	3	3	2	3	3	3	1	2	3	2	2
532	3	89	3	4	4	2	2	2	3	2	2	2	3	2	4	3	1	3	3	4	3	3	2	3	3	3	4	5	5	4	3	3	1	3	3	3	3	1	3	2	4	4
533	4	89	3	4	4	2	2	2	3	2	2	2	3	2	4	3	1	3	3	4	3	5	3	4	3	5	3	5	3	3	5	2	2	2	2	2	3	2	1	3	1	1
534	5	89	3	4	4	2	2	2	3	2	2	2	3	2	4	3	1	3	3	4	3	3	3	5	3	5	3	3	5	4	5	2	3	3	3	3	3	2	2	3	2	2
535	6	89	3	4	4	2	2	2	3	2	2	2	3	2	4	3	1	3	3	4	3	5	4	4	3	4	4	5	4	5	3	2	2	2	2	2	3	2	2	3	3	2
536	7	89	3	4	4	2	2	2	3	2	2	2	3	2	4	3	1	3	3	4	2	3	3	4	5	3	5	5	3	3	3	4	4	4	4	3	4	2	2	3	3	2
537	8	89	3	4	4	2	2	2	3	2	2	2	3	2	4	3	1	3	3	4	2	2	3	4	5	5	5	5	3	3	4	4	4	2	2	3	4	2	3	3	3	3
538	1	90	2	2	2	2	2	2	2	2	4	2	3	2	2	2	2	3	3	3	2	4	2	2	4	4	4	5	4	4	5	4	4	4	3	3	4	1	1	3	1	1
539	2	90	2	2	2	2	2	2	2	2	4	2	3	2	2	2	2	3	3	3	4	3	2	2	2	2	3	3	2	2	2	4	4	4	3	4	4	1	3	2	3	3
540	3	90	2	2	2	2	2	2	2	2	4	2	3	2	2	2	2	3	3	3	4	3	3	3	3	3	3	3	3	2	3	4	3	4	4	4	3	2	2	3	3	2
541	4	90	2	2	2	2	2	2	2	2	4	2	3	2	2	2	2	3	3	3	3	3	3	3	2	3	2	3	1	2	3	3	5	3	5	5	4	2	2	3	2	2
542	5	90	2	2	2	2	2	2	2	2	4	2	3	2	2	2	2	3	3	3	3	2	3	4	3	4	5	4	4	3	4	4	4	4	4	4	4	1	2	3	2	2
543	1	91	4	5	5	3	5	5	5	5	3	5	5	4	5	5	2	3	3	3	3	3	4	5	1	2	3	3	2	3	3	5	3	3	3	3	5	2	2	3	3	3
544	2	91	4	5	5	3	5	5	5	5	3	5	5	4	5	5	2	3	3	3	2	4	4	4	4	4	3	3	2	3	4	3	2	2	2	2	2	2	2	3	3	2
545	3	91	4	5	5	3	5	5	5	5	3	5	5	4	5	5	2	3	3	3	3	3	2	3	4	4	3	2	4	4	4	4	4	3	5	4	4	2	4	2	4	3
546	1	92	1	1	1	5	5	5	5	4	5	5	5	5	5	4	2	4	3	3	1	1	1	1	2	2	3	4	3	4	4	4	4	4	3	4	4	1	2	3	2	2
547	2	92	1	1	1	5	5	5	5	4	5	5	5	5	5	4	2	4	3	3	2	2	2	2	3	2	4	4	4	4	2	5	3	3	3	3	3	1	1	3	1	1
548	3	92	1	1	1	5	5	5	5	4	5	5	5	5	5	4	2	4	3	3	2	2	1	1	1	2	2	2	2	1	2	4	5	3	4	5	4	1	1	3	1	1
549	4	92	1	1	1	5	5	5	5	4	5	5	5	5	5	4	2	4	3	3	2	2	2	2	3	2	3	3	2	2	4	5	5	5	5	4	5	1	2	3	2	2
550	5	92	1	1	1	5	5	5	5	4	5	5	5	5	5	4	2	4	3	3	2	3	2	2	4	3	2	2	4	4	2	4	5	5	4	4	4	2	4	2	4	4
551	6	92	1	1	1	5	5	5	5	4	5	5	5	5	5	4	2	4	3	3	3	1	2	3	2	2	2	4	4	4	2	4	4	5	4	5	4	1	1	3	1	1
552	7	92	1	1	1	5	5	5	5	4	5	5	5	5	5	4	2	4	3	3	2	2	2	2	3	3	2	2	4	2	4	4	4	4	3	3	4	1	2	3	2	2
553	1	93	4	4	3	1	2	3	2	2	2	2	3	1	2	2	1	4	2	3	4	5	4	4	4	4	3	4	4	3	3	3	2	3	3	4	3	1	2	3	3	2
554	2	93	4	4	3	1	2	3	2	2	2	2	3	1	2	2	1	4	2	3	3	4	2	3	2	4	4	2	2	3	4	2	2	2	3	2	2	2	2	3	2	2
555	3	93	4	4	3	1	2	3	2	2	2	2	3	1	2	2	1	4	2	3	1	2	2	2	1	2	1	3	3	2	1	2	4	2	4	4	4	2	2	3	2	2
556	4	93	4	4	3	1	2	3	2	2	2	2	3	1	2	2	1	4	2	3	2	2	3	2	2	2	3	3	4	4	2	4	4	5	5	4	4	1	2	3	3	3
557	5	93	4	4	3	1	2	3	2	2	2	2	3	1	2	2	1	4	2	3	4	2	2	2	2	3	1	1	1	3	1	4	4	4	3	4	4	1	3	3	4	4
558	1	94	2	1	2	2	3	1	2	1	2	2	1	1	1	2	1	3	3	3	4	4	4	2	4	4	5	4	5	5	4	2	3	3	3	3	3	2	1	3	1	1
559	2	94	2	1	2	2	3	1	2	1	2	2	1	1	1	2	1	3	3	3	2	3	2	1	4	4	5	3	5	3	3	3	3	2	4	3	4	1	2	3	2	2
560	3	94	2	1	2	2	3	1	2	1	2	2	1	1	1	2	1	3	3	3	4	3	5	3	1	1	1	2	1	1	2	2	4	4	4	4	4	2	2	3	2	2
561	1	95	4	4	4	3	2	1	2	2	3	2	2	3	2	1	1	4	2	3	5	5	3	5	3	3	4	4	4	4	4	3	3	3	4	2	2	2	3	3	3	3
562	2	95	4	4	4	3	2	1	2	2	3	2	2	3	2	1	1	4	2	3	3	4	3	3	4	4	3	3	4	4	3	2	3	3	2	2	3	2	2	3	3	2
563	3	95	4	4	4	3	2	1	2	2	3	2	2	3	2	1	1	4	2	3	3	3	2	2	4	4	5	4	3	5	5	2	3	3	4	2	3	2	1	3	1	1
564	4	95	4	4	4	3	2	1	2	2	3	2	2	3	2	1	1	4	2	3	2	2	2	3	4	4	4	4	4	5	4	2	2	2	3	2	2	2	2	3	3	3
565	5	95	4	4	4	3	2	1	2	2	3	2	2	3	2	1	1	4	2	3	4	4	4	3	4	3	4	3	4	4	3	4	3	3	2	4	4	1	1	3	2	2
566	6	95	4	4	4	3	2	1	2	2	3	2	2	3	2	1	1	4	2	3	2	2	2	4	3	3	4	4	3	3	4	3	4	4	5	5	5	2	1	3	2	2
567	7	95	4	4	4	3	2	1	2	2	3	2	2	3	2	1	1	4	2	3	2	2	2	2	3	4	4	3	3	4	4	4	3	2	2	3	4	2	1	3	1	1
568	8	95	4	4	4	3	2	1	2	2	3	2	2	3	2	1	1	4	2	3	5	5	4	4	4	4	4	5	5	5	4	2	2	2	2	4	2	2	2	3	3	2
569	1	96	1	2	2	2	4	4	2	4	4	4	4	4	4	4	1	3	3	3	1	2	2	3	4	4	4	4	4	3	4	5	3	4	4	4	4	2	1	3	1	1
570	2	96	1	2	2	2	4	4	2	4	4	4	4	4	4	4	1	3	3	3	2	2	1	1	2	1	1	2	3	2	2	5	3	5	3	3	3	2	2	3	2	2
571	3	96	1	2	2	2	4	4	2	4	4	4	4	4	4	4	1	3	3	3	1	1	1	1	2	1	1	3	1	3	1	4	3	3	4	3	5	2	4	2	4	4
572	4	96	1	2	2	2	4	4	2	4	4	4	4	4	4	4	1	3	3	3	1	1	1	1	1	2	2	1	1	2	3	5	5	5	5	4	5	2	2	3	3	2
573	5	96	1	2	2	2	4	4	2	4	4	4	4	4	4	4	1	3	3	3	2	2	2	2	3	4	4	3	5	4	4	5	4	5	5	5	3	2	1	3	1	1
574	6	96	1	2	2	2	4	4	2	4	4	4	4	4	4	4	1	3	3	3	3	3	3	2	4	4	5	5	5	4	4	1	3	1	2	2	2	1	2	3	2	2
575	7	96	1	2	2	2	4	4	2	4	4	4	4	4	4	4	1	3	3	3	1	2	2	2	4	5	4	4	4	4	3	4	5	4	5	4	4	2	1	3	1	1
576	8	96	1	2	2	2	4	4	2	4	4	4	4	4	4	4	1	3	3	3	1	2	3	3	3	2	3	2	1	3	1	4	3	4	4	4	3	2	4	2	4	4
577	1	97	5	5	4	5	5	4	5	5	4	5	5	4	5	5	2	3	3	4	5	3	3	3	3	3	5	5	4	4	3	3	2	2	4	4	2	2	3	2	3	3
578	2	97	5	5	4	5	5	4	5	5	4	5	5	4	5	5	2	3	3	4	5	4	4	5	3	3	4	4	3	3	5	5	5	5	5	5	5	1	3	3	3	3
579	3	97	5	5	4	5	5	4	5	5	4	5	5	4	5	5	2	3	3	4	3	4	3	4	3	4	5	3	4	3	3	3	3	4	3	2	4	1	1	3	1	1
580	4	97	5	5	4	5	5	4	5	5	4	5	5	4	5	5	2	3	3	4	5	4	5	5	3	4	5	4	3	3	3	5	4	4	5	5	4	1	1	3	1	1
581	5	97	5	5	4	5	5	4	5	5	4	5	5	4	5	5	2	3	3	4	2	2	2	2	5	3	4	4	4	3	4	2	2	2	3	3	1	1	2	3	3	3
582	6	97	5	5	4	5	5	4	5	5	4	5	5	4	5	5	2	3	3	4	2	3	2	4	5	5	5	5	3	3	3	2	1	1	1	3	1	1	1	3	1	1
583	7	97	5	5	4	5	5	4	5	5	4	5	5	4	5	5	2	3	3	4	4	4	4	3	5	4	4	5	3	4	4	2	2	1	2	2	1	1	4	2	4	4
584	8	97	5	5	4	5	5	4	5	5	4	5	5	4	5	5	2	3	3	4	4	4	4	5	4	3	4	3	4	4	4	5	5	5	5	3	5	1	3	3	4	3
585	1	98	3	2	2	2	1	2	3	3	1	2	2	2	1	2	2	4	3	4	4	3	3	3	2	2	1	2	3	1	1	4	3	5	4	4	5	2	2	3	3	3
586	2	98	3	2	2	2	1	2	3	3	1	2	2	2	1	2	2	4	3	4	1	3	2	1	2	2	4	2	4	3	3	5	5	5	3	4	3	1	1	3	1	1
587	3	98	3	2	2	2	1	2	3	3	1	2	2	2	1	2	2	4	3	4	2	4	4	4	4	4	4	5	4	3	4	2	4	3	4	3	4	1	2	3	2	2
588	4	98	3	2	2	2	1	2	3	3	1	2	2	2	1	2	2	4	3	4	4	4	3	4	5	3	4	5	4	4	4	3	2	2	2	4	3	2	2	3	3	3
589	1	99	2	2	2	2	2	2	2	1	2	1	3	2	1	1	2	4	3	4	4	3	4	4	3	2	2	3	4	2	2	1	1	3	2	1	3	1	2	3	2	2
590	2	99	2	2	2	2	2	2	2	1	2	1	3	2	1	1	2	4	3	4	1	2	2	2	4	4	3	3	3	4	2	2	3	2	3	3	2	1	2	3	3	3
591	3	99	2	2	2	2	2	2	2	1	2	1	3	2	1	1	2	4	3	4	3	3	3	3	1	3	3	2	1	1	1	4	3	2	2	4	4	1	2	3	3	2
592	4	99	2	2	2	2	2	2	2	1	2	1	3	2	1	1	2	4	3	4	2	2	2	4	3	4	2	4	4	3	4	3	4	4	3	3	3	1	3	2	4	4
593	5	99	2	2	2	2	2	2	2	1	2	1	3	2	1	1	2	4	3	4	5	3	5	5	2	4	4	2	4	2	4	3	2	4	4	4	4	1	1	3	1	1
594	6	99	2	2	2	2	2	2	2	1	2	1	3	2	1	1	2	4	3	4	4	3	4	3	3	3	2	1	3	2	2	4	2	4	4	4	3	1	4	2	4	3
595	7	99	2	2	2	2	2	2	2	1	2	1	3	2	1	1	2	4	3	4	4	2	2	4	4	2	4	2	4	4	3	4	3	2	4	4	4	1	1	3	1	1
596	1	100	3	3	3	3	3	5	3	3	3	3	3	4	3	4	1	4	3	3	1	1	2	2	2	1	3	1	2	2	1	5	4	4	5	5	3	1	3	2	4	4
597	2	100	3	3	3	3	3	5	3	3	3	3	3	4	3	4	1	4	3	3	3	2	3	2	2	2	2	2	3	2	2	5	4	4	5	5	4	2	1	3	1	1
598	3	100	3	3	3	3	3	5	3	3	3	3	3	4	3	4	1	4	3	3	3	2	1	2	4	2	2	2	2	2	2	2	3	3	2	3	2	2	4	2	4	3
599	4	100	3	3	3	3	3	5	3	3	3	3	3	4	3	4	1	4	3	3	2	3	1	3	3	1	2	3	2	3	2	5	5	5	5	5	5	2	1	3	1	1
600	5	100	3	3	3	3	3	5	3	3	3	3	3	4	3	4	1	4	3	3	3	3	3	2	3	3	3	1	2	3	3	2	4	4	2	4	4	2	4	3	4	4
601	6	100	3	3	3	3	3	5	3	3	3	3	3	4	3	4	1	4	3	3	1	2	1	2	1	2	1	3	3	3	3	5	5	4	5	5	5	1	1	3	1	1
602	7	100	3	3	3	3	3	5	3	3	3	3	3	4	3	4	1	4	3	3	2	2	1	1	3	2	1	2	1	2	3	4	2	2	3	2	3	1	2	3	3	3
603	8	100	3	3	3	3	3	5	3	3	3	3	3	4	3	4	1	4	3	3	1	3	1	3	1	2	1	1	1	2	1	5	5	5	3	5	5	2	1	3	1	1
